# Postoperative Nausea and Vomiting in Regional Anesthesia

## A Review

Alain Borgeat, M.D.,\* Georgios Ekatodramis, M.D.,† Carlo A. Schenker, M.D.†

ANESTHESIA has become remarkably safe, and while death and permanent damage have become rare occurrences, other sequelae of anesthesia are gaining more importance. Postoperative nausea and vomiting (PONV) still is the most troublesome adverse event encountered in the recovery room, despite advances in prevention and treatment.<sup>1</sup> The incidence of PONV has remained high and has a major negative impact on patient satisfaction about the overall surgical experience.<sup>2</sup> Furthermore, the ongoing trend toward ambulatory procedures has increased the focus on PONV as its occurrence may delay discharge<sup>3</sup> or cause unanticipated hospital admission.<sup>4</sup>

General anesthesia has long been considered as causing a greater frequency and severity of PONV than regional anesthetic techniques. Recent studies investigating this time-honored dictum in a controlled manner mostly, but not unanimously, confirmed it.<sup>5–8</sup> Accordingly, considerable effort has been invested to examine etiology, define patients at risk, and outline preventive and therapeutic strategies in patients undergoing general anesthesia. Reviews dealing with PONV have discussed almost exclusively general anesthesia and largely ignored regional anesthesia.<sup>9,10</sup> This contrasts with the increasing popularity of regional anesthesia. A survey in Europe showed that one third of patients are undergoing regional anesthesia for their operative procedure.<sup>11</sup> In France, the proportion of regional anesthesia increased from 15 to 25% of all anesthetics administered from 1980 to 1996.<sup>12</sup>

The number of local anesthetic and analgesic agents available for regional anesthesia has increased over the

last two decades. Since the introduction of intrathecal and epidural morphine in 1979, a multitude of medications, such as synthetic opioids,  $\alpha_2$ -agonists, and cholinesterase inhibitors, have been introduced in an attempt to enhance the action of local anesthetics. The decision about their usefulness will not only rely on their effects on nerve blockade and pain relief, but also on their influence on side effects such as PONV.

This review focuses on PONV in the setting of perioperative regional anesthesia. General aspects of PONV, such as physiology, patient, and perioperative factors involved are discussed. Few studies regarding these issues have been specifically devoted to regional anesthesia. Therefore, much information must be derived from investigations of general anesthesia. Specific regional anesthetic techniques and the influence of adjunctive medications on PONV are also presented. Combined general-regional anesthesia is purposefully excluded, avoiding the many variables introduced by general anesthesia. A final section is devoted to continuous peripheral nerve blocks and their possible impact on PONV.

## General Aspects of Postoperative Nausea and Vomiting

### *The Relevance of Postoperative Nausea and Vomiting*

Patients often express fear about PONV when questioned before surgery. Its importance compared with other possible postoperative sequelae varies but is generally high.<sup>13</sup> When questioned about issues of concern, 22% of 800 patients gave PONV the highest level of concern, compared with 34% for postoperative pain and 24% for waking up during surgery.<sup>14</sup>

### *The Difficulty of Studying Postoperative Nausea and Vomiting*

The investigation of PONV has not proved to be an easy task. Outlines for adequate methodology have been published,<sup>15</sup> but several aspects make generalization or comparison of results difficult.

\*Professor and Chief of Staff. †Consultant.

Received from the Department of Anesthesiology, Orthopedic University Clinic Zurich/Balgrist, Zurich, Switzerland. Submitted for publication February 22, 2002. Accepted for publication August 27, 2002. Support was provided solely from departmental and/or institutional sources.

Address reprint requests to Dr. Borgeat: Department of Anesthesiology, Orthopedic University Clinic of Zurich/Balgrist, Forchstrasse 340, CH-8008 Zurich, Switzerland. Address electronic mail to: aborgeat@balgrist.unizh.ch. Individual article reprints may be purchased through the Journal Web site, [www.anesthesiology.org](http://www.anesthesiology.org).

There is a wide array of patient, anesthetic, and surgical factors that influence incidence and severity of PONV.<sup>9-10</sup> Methods of determining whether a patient suffers PONV vary. Patients may be asked repeatedly about nausea, or only complaints offered spontaneously may be registered. The occurrence of vomiting may be known from patient interrogation or derived from nurses' notes, which have been shown to underreport emesis events by 50%.<sup>16</sup> Some studies distinguish between nausea, retching, and vomiting, whereas others use a single term. The incidence may refer to the number of patients experiencing PONV or the number of events. The severity is either not differentiated or reported in categories (mild-severe), in visual analog scale scores or elaborate nausea scores, or implied by the need for antiemetic medications. Another source of confusion is the observation time. Intraoperative nausea and vomiting and PONV are sometimes not reported separately. The postoperative recording may end with the discharge of the patient from the postanesthetic care unit, the first analgesic administration after a regional anesthetic, or the passing of anywhere between 12 and 72 h after a defined "time zero."

Few studies are specifically designed to investigate PONV associated with regional anesthesia. Usually the main observation is centered on factors describing the block, such as intensity or duration. PONV, if reported at all, is only a secondary endpoint. This implies that the number of patients studied is tailored to the need to show statistical significance regarding the primary endpoint. When such studies report no difference in PONV rates between groups, the risk of a type II error should be kept in mind.<sup>17</sup> One way to satisfy the need for high patient numbers is to conduct a multicenter study. But despite using strict protocols, marked variations in the rate of PONV across hospitals were found, which were not explained by the case mix of patients.<sup>16</sup> Equally striking are the differences in results among countries reported in multinational investigations.<sup>18</sup> Metaanalysis as another means to achieve larger numbers of patients is not only hampered by differences in study designs, but also by the high rate of double-reporting patients, estimated to occur up to 25% in some PONV studies.<sup>19</sup> The same problem may also occur in a review article.<sup>20</sup>

#### *Mechanisms of Postoperative Nausea and Vomiting in Regional Anesthesia*

Several different mechanisms may play a role in causing PONV in patients who receive regional anesthesia. In a retrospective analysis, Crocker and Vandam<sup>21</sup> found that hypotension (systolic blood pressure < 80 mmHg), a block higher than the fifth thoracic segment, and the anesthetic mixture (e.g., addition of vasoconstrictors to the local anesthetic) increased the incidence of nausea and vomiting during spinal anesthesia. The prospective work of Carpenter *et al.*<sup>22</sup> in a similar setting confirmed

these findings. It appears that not one single mechanism is responsible for causing PONV. Several mechanisms may be active simultaneously, and the importance of each in a particular case may remain speculative.

Nausea and vomiting are not among the cardinal signs and symptoms of toxicity of the currently used local anesthetics when infused systemically, although they may occur in the context of general cerebral toxicity.<sup>23</sup> Consequently, they are usually not considered as emetogenic.

The addition of other medications to local anesthetics for regional anesthesia has become increasingly popular. When administered intrathecally, hydrophilic substances (e.g., morphine) tend to remain in the cerebrospinal fluid for prolonged periods of time and can move rostrally by diffusion or bulk movements of cerebrospinal fluid, reaching the area of the chemoreceptive trigger zone. Morphine concentrations in the medulla oblongata reach significant levels within 5–6 h, as evidenced by the onset of trigeminal analgesia.<sup>24</sup> This time coincides with the peak time of nausea observed after spinal administration of morphine.<sup>25</sup> Lipophilic opioids are taken up quickly into the spinal cord. Nonetheless, about 10% of a dose of fentanyl administered in the lumbar intrathecal space can be recovered in the cervical cerebrospinal fluid as early as 30 min after injection, demonstrating rapid ascension.<sup>26</sup> Baricity of the solutions will influence drug kinetics in the cerebrospinal fluid. In fact, hyperbaric neostigmine was shown to cause lower PONV rates than an isobaric formulation, an effect attributed to decreased rostral spread.<sup>27</sup>

Epidural administration of drugs leads to rapid vascular uptake that provides access to the chemoreceptive trigger zone *via* the bloodstream. Peak plasma concentrations may be achieved within 5–15 min,<sup>28</sup> and systemic concentrations often approach those obtained after a similar intramuscular dose.

In the case of peripheral perineural administration, adjuvant drugs are absorbed into the systemic circulation, thereby reaching the chemoreceptive trigger zone. Centripetal intraneural transport of substances like opioids has been documented,<sup>29</sup> but this mechanism is considered insignificant in drug distribution.<sup>30</sup> Femoral perineural application or intramuscular administration of morphine leads to the same low morphine concentrations in cerebrospinal fluid.<sup>31</sup>

Hypotension is a common occurrence during neuraxial anesthesia. Low blood pressure may lead to brain stem ischemia, which is thought to activate the circulatory, respiratory, and vomiting centers grouped together in the medulla.<sup>32</sup> Consequently, supplemental oxygen can relieve nausea in such circumstances.<sup>33</sup> Other investigators have speculated that hypotension rather leads to gut ischemia and the release of emetogenic substances (e.g., serotonin) from the intestines.<sup>34</sup> These different hypotheses linking hypotension and PONV still need to be clarified and the mechanism linking hypotension to nau-

sea and vomiting defined.<sup>32,35</sup> Strategies avoiding hypotension were shown to be effective in reducing emesis.<sup>36,37</sup> Many of these investigations were limited to patients undergoing cesarean section, and most used ephedrine as a pressor agent, which is suspected to possess antiemetic activity unrelated to its hemodynamic action.<sup>38</sup>

Neuraxial anesthesia also changes the function of the gastrointestinal tract.<sup>39</sup> Sympathetic blockade by local anesthetics creates unopposed vagal action, resulting in gastrointestinal hyperactivity. The efficacy of vagolytic agents to relieve nausea during spinal anesthesia has been taken as evidence of the importance of this mechanism.<sup>33</sup>

### Patient Factors

Considerable effort has been invested to identify patients at increased risk of PONV. These studies often involve the use of elaborate statistics, and they vary in patient characteristics as well as surgical and anesthetic case mix.<sup>16,22,40,41</sup> Unfortunately, because most do not analyze a regional anesthesia group separately, there is little information available on the influence of specific patient risk factors on PONV in the context of regional anesthesia.

**Age.** Younger age was shown to be a risk factor for PONV in the studies by Apfel *et al.*,<sup>40</sup> Sinclair *et al.*,<sup>41</sup> and Cohen *et al.*<sup>16</sup> No significant correlation, however, was found by Larsson *et al.*<sup>42</sup> or Koivuranta *et al.*<sup>43</sup> Quinn *et al.*<sup>44</sup> reported results of 3,850 inpatients and analyzed separately the 606 patients undergoing regional anesthesia. Younger age was significantly associated with nausea or vomiting in both general and regional anesthesia groups. Standl *et al.*<sup>8</sup> interviewed 217 patients 4 days after spinal anesthesia for lower extremity orthopedic surgery. Patients younger than 20 yr complained most often of PONV (20%), while only 4% of patients between 40 and 60 yr of age did so. For patients older than 60 yr, the risk increased again to 9%. This increase at older age was also observed by Kalso<sup>45</sup> in 50 cases of spinal anesthesia for orthopedic surgery, but older patients had more complex surgeries and more hypotensive episodes.

In conclusion, the role of age remains unclear in view of these results in general as well as mixed and regional anesthetic groups. It might be safe to speculate, therefore, that any influence of age on PONV that exists in regional anesthesia patients may be limited, but the impact of the wake state—stress—needs to be clarified. Finally, awake patients would be more likely to respond to certain medications (*e.g.*, opioids) with nausea and vomiting.

**Gender.** There is more consistency regarding the influence of gender. Female patients were found to be at significantly higher risk of PONV in the studies of Apfel *et al.*,<sup>40</sup> Cohen *et al.*,<sup>16</sup> Sinclair *et al.*,<sup>41</sup> Larsson *et al.*,<sup>42</sup>

and Koivuranta *et al.*<sup>43</sup> The latter also specified this relation for their regional anesthetic group, where they found PONV rates of 48% for females and 26% for males. The same results were found by Quinn *et al.*<sup>44</sup> In the regional anesthesia group, they reported postoperative nausea in 28% of women and 14% of men, and vomiting in 17% and 7%, respectively.<sup>44</sup> A relation of nausea and vomiting to the menstrual cycle was pointed out in an investigation of 68 women with epidural anesthesia for lower extremity surgery, with the peak incidence during days 25 to the end of cycle.<sup>46</sup> These studies indicate that female gender is a significant risk factor for PONV in patients receiving general and regional anesthesia, while the influence of the menstrual cycle needs further study.

Other factors, such as previous history of PONV or motion sickness, smoker–nonsmoker status, or obesity have not been sufficiently investigated in patients undergoing regional anesthesia.

To summarize, patient factors linked to increased risks of PONV in patient undergoing general anesthesia need to be further clarified those undergoing in regional anesthesia.

### Systemic Anesthetic Factors

**Premedication.** The role of premedication in regional anesthesia remains largely uninvestigated, and there is no information that any difference exists as compared with general anesthesia. Therefore, no conclusion can be drawn from the various premedication given, with the exception that opioids remain a risk.

**Intraoperative Sedation.** In addition to premedication, many patients receive intraoperative sedation to supplement regional anesthesia, to improve patient acceptability and comfort, and to reduce stress and anxiety. A wide variation exists in the frequency of use of sedation and the agents administered.<sup>47</sup> While clonidine is considered not to influence the incidence of PONV,<sup>48</sup> methohexital,<sup>49</sup>  $\gamma$ -hydroxybutyrate,<sup>50</sup> or etomidate<sup>51</sup> have shown to cause significantly more nausea and vomiting compared with midazolam or propofol sedation, respectively. From these data, it is evident that the decision to administer adjunctive sedation must be followed by a careful evaluation of what agents to use, as the consequences of PONV might well be significant. The sedatives most often given to supplement regional anesthesia are midazolam and propofol. Both drugs may have a positive impact on PONV. Midazolam has been shown to be as effective as droperidol in preventing PONV after strabismus surgery in outpatient children.<sup>52</sup> The same group found similar results after tonsillectomy in children.<sup>53</sup> Propofol has been claimed to possess antiemetic effects at sedative doses,<sup>54</sup> but these results were not confirmed by Lacroix *et al.*<sup>55</sup> However, it is accepted that propofol should be part of the intraoperative management in a patient with PONV.<sup>56</sup> The mechanism of action of any antiemetic effect of propofol has not been elucidated,



but Cechetto *et al.*<sup>57</sup> recently showed that propofol decreases the concentration of both serotonin and 5-hydroxyindoleacetic acid within the central nervous system of the fourth ventricle at the level of the area postrema. Although the positive effects of either midazolam or propofol on PONV has not been specifically studied in the context of regional anesthesia, these two drugs appear most appropriate to supplement a central or peripheral block. Propofol has the advantage of having better pharmacokinetic properties,<sup>58</sup> making its titration easier than midazolam or other sedatives.<sup>59</sup>

**Hydration.** Another factor that has been implicated in negative postoperative outcome is dehydration. The administration of extra fluid is standard practice, especially in neuraxial techniques, and the amount is usually titrated to blood pressure. Correspondingly, Carpenter *et al.*<sup>22</sup> found no correlation between intraoperative amount of fluid administration and intraoperative nausea as long as no hypotension occurred during spinal anesthesia. Fluid administration for the purpose of blood pressure stabilization is rarely an issue in peripheral nerve blocks, but data regarding the impact of different regimens of hydration regimens on PONV are not available.

#### *Postoperative Factors*

**Pain.** The possible influence of postoperative pain management on PONV remains incompletely understood. While there is no doubt that opioid administration can provoke nausea, opioid analgesia relieved PONV in 80% of patients who experienced both pain and PONV concomitantly in the study by Andersen *et al.*<sup>60</sup> Some investigators used analgesic regimens with nonopioid adjunctive medications. Opioid consumption was thereby reduced, but PONV rates did<sup>61,62</sup> or did not<sup>63,64</sup> diminish. Opioid reduction was<sup>65,66</sup> or was not<sup>67,68</sup> followed by reduced PONV rates during use of regional techniques. Opioid-free intraoperative and postoperative regimens are rare, but could provide insight into the complex issue of pain, pain medication, and PONV. Callesen *et al.*<sup>69</sup> compared three groups of patients undergoing hysterectomy receiving either opioid-free epidural-spinal anesthesia, general anesthesia with continuous epidural bupivacaine, or continuous epidural bupivacaine and morphine, respectively. Despite poorer pain control, patients in the opioid-free group experienced significantly less PONV in the postoperative period. Similar findings were published by Wajima *et al.*<sup>70</sup> In a series of investigations in patients undergoing arm surgery with brachial plexus anesthesia continued postoperatively by catheter infusion, the investigators observed that complete omission of opioids led to the lowest incidence of PONV despite more frequent need for nonopioid rescue pain medication, while the route of administration of opioids (systemically or by brachial plexus catheter) did not matter. Such findings would,

contrary to the conclusions of Andersen *et al.*,<sup>60</sup> lend support to the statement that it is opioid-based pain management rather than pain itself that provokes PONV. In this context, the application of continuous regional anesthesia and the subsequent opioid-sparing effect is most likely beneficial in reducing the incidence of PONV.

The impact of other factors such as movement on PONV and oral intake have not yet been investigated in patients undergoing regional anesthesia.

To summarize, operative and postoperative factors that have been identified as risk factors for PONV after general anesthesia have not been thoroughly investigated in the context of regional anesthesia and cannot be automatically extrapolated from one technique to the other. Further studies are warranted to specify the impact of these factors on PONV in the context of regional anesthesia.

#### *Specific Regional Anesthetic Techniques and Postoperative Nausea and Vomiting*

It is clear that PONV is a complex, multifactorial problem. To design and complete a study with sufficient size, controlling for all factors influencing PONV, represents a monumental task. Furthermore, the published studies differ in design in a way that makes comparison often difficult or impossible.<sup>71</sup> Heterogeneity is a recognized weakness of systematic reviews and metaanalysis and may therefore weaken the impact of the results, particularly when dealing with regional anesthesia and PONV, since the latter has rarely been a primary endpoint.

**Spinal Anesthesia.** The reported incidence of PONV associated with spinal anesthesia varies widely.<sup>22,72,73</sup> Carpenter *et al.*<sup>22</sup> studied 952 patients undergoing all types of procedures. They found an intraoperative rate of nausea of 18% and vomiting of 7%, but it must be noted that 12% of their patients received additional inhalational anesthesia. Older prospective studies reported postoperative retching and vomiting in 11.1%<sup>74</sup> or nausea and vomiting in 21.1%<sup>75</sup> of patients after spinal anesthesia. Perioperative rates of 0–21% have been noted in patients younger than 21 yr.<sup>76,77</sup> Comparatively high rates have been repeatedly observed in the context of major orthopedic (*i.e.*, joint replacement) surgery and cesarean section.

**Choice of Local Anesthetics.** Clinical experience would indicate that the choice of local anesthetic used for intrathecal injection does not influence PONV. Most investigations found no difference when comparing local anesthetics, but the number of patients involved was usually small.<sup>78,79</sup> However, the 78 patients receiving procaine in the study by Carpenter *et al.*<sup>22</sup> suffered significantly more nausea and vomiting than those given other local anesthetics despite similar degrees of hypotension. The investigators could not explain this finding. A more recent study by Hodgson *et al.*<sup>80</sup> comparing

lidocaine to procaine for ambulatory surgery confirmed this result as the incidence of PONV did not differ between groups. It therefore appears that the agent used is of little importance.

Similarly, the dose of drug does not seem to influence the occurrence of PONV, as long as hypotension is avoided. Sheskey *et al.*<sup>81</sup> administered bupivacaine in doses of 10, 15, or 20 mg to 60 patients undergoing transurethral resection of the prostate, with no difference in nausea between groups, while hypotension was treated with vasopressors. Povey *et al.*<sup>82</sup> reported no case of nausea or vomiting in 30 patients given either 25 or 30 mg bupivacaine, resulting in a mean sensory block height of T4 and T3, respectively, when blood pressure was maintained with ephedrine. Similarly, there was no difference in emetic sequelae following 60 *versus* 80 mg of mepivacaine.<sup>83</sup> The influence of the baricity of the solutions has not been investigated in the context of PONV, but one has to remember that hyperbaric solutions usually have a greater spread.

**Intrathecal Epinephrine.** The addition of epinephrine to local anesthetics caused more nausea and vomiting in the patients studied by Carpenter *et al.*<sup>22</sup> This occurred despite no difference in the rate of hypotension. This result would corroborate the finding of a retrospective analysis from 1959, in which Crocker and Vandam<sup>21</sup> also associated intraoperative emesis with the use of epinephrine, but the investigators attributed the effect to a higher level of block. More recently, the combined use of procaine and epinephrine resulted in significantly more PONV in 60 patients undergoing short procedures when compared with procaine alone (30 *vs.* 10%).<sup>72</sup> Block heights did not differ between groups, but patients administered epinephrine required more vasopressors.

Other, mostly small investigations comparing various subarachnoid solutions with or without epinephrine in different settings have found higher PONV rates in patients receiving epinephrine<sup>84,85</sup> or no difference.<sup>86-89</sup> These data indicate that epinephrine may be a significant factor in PONV. The mechanism of the action in the absence of hemodynamic or block height differences remains unclear, but systemic epinephrine has been linked to increased serotonin release<sup>34</sup> as well as to effects on the chemoreceptive trigger zone mediated by  $\alpha$ -adrenergic receptors.<sup>90</sup>

**Intrathecal Morphine.** Intrathecal morphine causes a dose-dependent increase in vomiting in volunteers.<sup>91</sup> However, when dealing with patients undergoing painful surgery, the picture becomes less clear. Several dose-finding studies investigated the efficacy and side effects of intrathecal morphine. Kalso<sup>45</sup> found, over 48 h, a slight but not statistically significant difference in nausea or vomiting after adding 0, 0.2, or 0.4 mg morphine to bupivacaine for orthopedic surgery (40 *vs.* 50 *vs.* 55%, respectively). Jacobson *et al.*<sup>92</sup> reported PONV rates of 60 *versus* 50 *versus* 100% after 0, 0.3, and 1 mg mor-

phine, respectively, used in joint replacement surgery. In a study involving 181 patients scheduled for transabdominal hysterectomy with tetracaine spinal anesthesia, patients receiving 0.1 mg morphine had significantly more emetic sequelae than those administered doses between 0.03 and 0.08 mg.<sup>93</sup> Weber *et al.*<sup>94</sup> conducted a large investigation involving 300 patients undergoing major orthopedic surgery of the lower extremities, comparing bupivacaine to bupivacaine with 0.2 mg morphine. There was no statistically significant difference between groups with regard to subjective feeling or consumption of antiemetics (60 *vs.* 56.6%). These data suggest that, at least in more extensive surgery where effective postoperative pain relief is warranted, intrathecal morphine is not associated with higher PONV rates than opioid-based systemic analgesia, especially if a dose of less than 0.1 mg is chosen. Use in minor surgical procedures has not been well studied, but reports about significantly higher PONV incidence after 0.2-1.0 mg intrathecal morphine for transurethral resection of the prostate compared with a morphine-free solution should produce caution.<sup>95,96</sup>

Similarly, early studies dampened the enthusiasm for subarachnoid morphine to ease labor pain secondary to nausea and vomiting rates consistently exceeding 50%, although morphine doses were usually high (0.5-2 mg).<sup>97,98</sup> A reduced dose of 0.25 mg also caused significantly more nausea and vomiting than a morphine-free epidural regimen when 59 parturients were studied by Caldwell *et al.*<sup>99</sup> In a recent investigation in 95 women, however, Yeh *et al.*<sup>100</sup> compared a fentanyl-bupivacaine solution with or without 0.15 mg morphine and found no difference in nausea or vomiting.

When morphine was added to local anesthetics to provide spinal anesthesia for cesarean section, an increase of nausea or vomiting was observed postoperatively but not intraoperatively.<sup>89,101,102</sup> This is in accordance with an investigation showing the peak incidence of nausea and vomiting between 4 and 6 h after completion of surgery when intrathecal morphine was administered.<sup>25</sup> Furthermore, the PONV rates were higher after larger doses (0.2 or 0.25 mg) of morphine were administered compared with 0.1 mg.<sup>103,104</sup> Using even smaller amounts, Cardoso *et al.*<sup>105</sup> showed a trend toward lower emetic sequelae with smaller doses of 0.05 and 0.025 mg *versus* 0.1 mg morphine in a study involving 120 term parturients. A metaanalysis confirmed a dose-dependent increase in PONV when morphine is used.<sup>106</sup>

**Intrathecal Fentanyl.** The highly lipophilic synthetic opioids, fentanyl and sufentanil, produce intense but shorter-lasting analgesia than morphine when applied intrathecally. The administration of intrathecal fentanyl to volunteers by Liu *et al.*<sup>107</sup> did not provoke nausea. Studies comparing varied doses of intrathecal fentanyl with opioid-free solutions in patients undergoing lower

extremity revascularization procedures<sup>108</sup> found no difference in PONV incidence among groups. Several studies showed rather low rates of vomiting in the immediate perioperative period in patients receiving intrathecal fentanyl *versus* control patients, although the sample sizes were notoriously small.<sup>109,110</sup> Michaloudis *et al.*<sup>111</sup> administered a spinal anesthetic to 48 patients (American Society of Anesthesiologists status II–IV) undergoing various surgical procedures and continued a bupivacaine–fentanyl mixture *via* the intrathecal route for 5 days postoperatively, and none of their patients complained of nausea or vomiting. This contrasts with the 30% PONV rate reported by Niemi *et al.*<sup>112</sup> after 24 h of intrathecal fentanyl infusion, but almost all of their patients received additional intramuscular morphine.

Two dose-finding studies evaluated the use of intrathecal fentanyl for treatment of labor pain. While Herman *et al.*<sup>113</sup> reported not a single occurrence of nausea and vomiting in 90 parturients administered up to 25  $\mu$ g fentanyl, Palmer *et al.*<sup>114</sup> gave up to 45  $\mu$ g in 84 women and stated that this side effect was “uncommon in all groups, occurring too infrequently for any meaningful comparisons to be made.”

Earlier studies in patients undergoing cesarean section have also shown that intrathecal fentanyl led to no greater frequency of nausea or vomiting than when local anesthetics alone were used,<sup>84,115,116</sup> a finding confirmed by metaanalysis.<sup>106</sup> Several investigators found lower rates of nausea or vomiting during surgery when using intrathecal fentanyl,<sup>117,118</sup> and 20  $\mu$ g added to bupivacaine recently proved more effective than 4 mg ondansetron given immediately after spinal placement.<sup>119</sup> This beneficial effect of fentanyl was ascribed to improved control of visceral pain during surgery.

**Intrathecal Sufentanil.** The intrathecal injection of sufentanil has led to emetic sequelae in volunteers.<sup>120,121</sup> A dose-finding study in patients scheduled for extracorporeal shock wave lithotripsy found no increase in PONV at the highest dose of 20  $\mu$ g, but the fact that patients administered lower doses required significantly more propofol because of inadequate analgesia might have confounded the results.<sup>122</sup> The comparison of sufentanil to lidocaine in a similar setting<sup>123</sup> showed no increase in nausea or vomiting in patients receiving sufentanil. Similarly, the direct comparison of sufentanil *versus* fentanyl in 42 patients after hip surgery revealed a similar incidence of PONV.<sup>124</sup>

Sufentanil has gained widespread popularity for intrathecal use in the treatment of labor pain. Many small investigations evaluated different doses from 0 to 10  $\mu$ g sufentanil, mostly finding overall low figures for nausea and vomiting with no dose relation.<sup>125–127</sup> A recently published study in 170 women reported significantly higher rates of both nausea and vomiting, however, when a dose of 10  $\mu$ g sufentanil was compared with the control group (24 *vs.* 3% for nausea and 15 *vs.* 0% for

vomiting), but most nausea was rated as mild.<sup>128</sup> When compared with fentanyl, no difference in PONV was found with sufentanil.<sup>129,130</sup>

Little information has been published regarding sufentanil use during cesarean section. Dahlgren *et al.*<sup>131</sup> administered 2.5 or 5  $\mu$ g sufentanil with bupivacaine and found significantly less intraoperative vomiting compared with the placebo group. There was no difference compared with the group that received fentanyl (10  $\mu$ g) intrathecally, confirming results of an earlier report by Pan *et al.*<sup>132</sup>

**Meperidine as an Intrathecal Agent.** Meperidine possesses local anesthetic as well as opioid properties.<sup>133</sup> It can therefore be administered alone or in combination with local anesthetics to provide operative spinal anesthesia. Some studies have shown no difference in vomiting or PONV when meperidine was compared with local anesthetic agents,<sup>134,135</sup> but several investigators noted higher rates after meperidine use, especially during the intraoperative phase.<sup>136</sup>

This side effect has also been observed when meperidine was used in laboring women. Honet *et al.*<sup>130</sup> registered significantly higher nausea scores with meperidine compared with fentanyl or sufentanil, similar to an earlier investigation.<sup>137</sup> Recently, a study designed to compare fentanyl–bupivacaine with meperidine was terminated early because of significantly more nausea and vomiting in the meperidine group.<sup>138</sup>

For cesarean section, meperidine has not gained great interest, especially because the duration of anesthesia is often inadequate. PONV rates of 29% and 32% have been reported after its use, but controlled studies are absent.<sup>139,140</sup>

Overall evidence points out that, although all intrathecal opioids have the potential to increase the risk of PONV, they are not “created equal” in their tendency to do so. Meperidine appears to be the most harmful. Morphine, especially at higher doses, follows next. The lipophilic opioids, fentanyl and sufentanil, seem to carry the lowest risk.

**Intrathecal Clonidine.** The addition of clonidine to intrathecal solutions to prolong the action of local anesthetics results in no increase in PONV. There is no evidence after multiple studies, often involving patients undergoing orthopedic surgery, that the risk of PONV increases after addition of clonidine to various local anesthetics or opioids.<sup>141–143</sup>

Similarly, a dose-response study in laboring patients in which clonidine was given as a single agent in a dose up to 200  $\mu$ g showed no nausea or vomiting as a side effect.<sup>144</sup> Also, the addition of clonidine to sufentanil,<sup>145</sup> sufentanil–bupivacaine,<sup>146</sup> or fentanyl–bupivacaine<sup>147</sup> did not result in a significant change in the incidence of PONV in this setting.

Clonidine administered with local anesthetics for cesarean section equally lacks emetic side effects. In con-



**Table 1. Pure Local Anesthetic Epidural Blockade and PONV**

| Study                                   | Patients, n | Type of Surgery        | PONV, % | Comments                                     |
|-----------------------------------------|-------------|------------------------|---------|----------------------------------------------|
| Jorgensen <sup>158</sup>                | 371         | General                | 20      | Vomiting in 14%                              |
| Brockway <i>et al.</i> <sup>159</sup>   | 120         | General                | 14      | Vomiting in 2%                               |
| Morrison <i>et al.</i> <sup>160</sup>   | 91          | Hernia, varices        | 11      | Vomiting in 2%                               |
| Wood and Rubin <sup>161</sup>           | 44          | Abdominal gynecologic  | 9       |                                              |
| Finucane <i>et al.</i> <sup>162</sup>   | 116         | Abdominal hysterectomy | 68      | Vomiting in 26%, 28% also general anesthesia |
| Wolff <i>et al.</i> <sup>163</sup>      | 126         | Orthopedic             | 8       |                                              |
| Niesel <i>et al.</i> <sup>164</sup>     | 44          | Orthopedic             | 18      |                                              |
| Bjornestad <i>et al.</i> <sup>165</sup> | 122         | Cesarean section       | 18      | Intraoperative, postoperative 4%             |
| Bader <i>et al.</i> <sup>166</sup>      | 63          | Cesarean section       | 40      | Vomiting in 10%                              |

PONV = postoperative nausea and vomiting.

trast, Pan *et al.*<sup>148</sup> documented significantly higher rates of nausea and vomiting when 150  $\mu$ g of clonidine was added to bupivacaine (30 *vs.* 10%), but this may have been because of an increased incidence of hypotension in the clonidine group (70% *vs.* 40%). It seems that the potential of clonidine to influence PONV may not be related to the drug itself, but to the balance between hypotensive and sedative effects.

**Intrathecal Neostigmine.** Neostigmine has recently been investigated as an adjuvant medication for spinal anesthesia. In volunteer studies, a dose-dependent increase in nausea and vomiting was observed after neostigmine administered either alone<sup>27</sup> or in combination with a local anesthetic.<sup>149</sup> This emetogenic effect of spinal neostigmine also became evident in patient studies. In a dose-finding study, 92 women undergoing vaginal hysterectomy were given a bupivacaine spinal anesthetic with neostigmine (0–75  $\mu$ g). Even the 25- $\mu$ g group required significantly more treatment for nausea in the recovery room than patients given bupivacaine alone (54 *vs.* 29%), while significantly higher nausea scores were documented in the 75- $\mu$ g group.<sup>150</sup> Other investigations confirm the high frequency of this side effect.<sup>151,152</sup> An additional problem seems to be the poor efficacy of antiemetics in neostigmine-induced nausea and vomiting.<sup>153,154</sup>

Little information exists regarding use of neostigmine for labor analgesia. Nelson *et al.*<sup>155</sup> reported severe nausea and vomiting after 20  $\mu$ g neostigmine but observed no significant difference when comparing 9  $\mu$ g sufentanil with 6  $\mu$ g sufentanil plus 10  $\mu$ g neostigmine.<sup>155</sup> However, Owen *et al.*<sup>147</sup> found a significantly higher rate

of nausea when neostigmine (10  $\mu$ g) was added to a bupivacaine-fentanyl-clonidine solution (33 *vs.* 0%).

The same picture emerges when neostigmine is administered as an adjunct in spinal anesthesia for cesarean section. A dose-dependent increase in nausea and vomiting was found in a small dose-response study, with an incidence of 100% after a 100- $\mu$ g dose of neostigmine.<sup>156</sup> A dose of 50  $\mu$ g increased the rate from 10% in control patients to 79% in another study.<sup>148</sup> A high rate of severe nausea was found by Chung *et al.*,<sup>157</sup> and even a dose of 10  $\mu$ g given with bupivacaine led to an increase in the occurrence of nausea requiring treatment from 3% of patients in the control group to 38% in the neostigmine group.<sup>157</sup> Clinical experience demonstrates that the increased incidence of PONV associated with the application of spinal neostigmine outweighs its possible beneficial effect.

**Epidural Anesthesia.** There is a wide range of PONV incidences reported when epidural anesthesia was administered for surgery (tables 1 and 2).<sup>158–174</sup> The epidural injection of only local anesthetics is associated with a very low risk. Only a single case of nausea was registered when 37 male volunteers were given up to 660 mg ropivacaine or 550 mg bupivacaine.<sup>175</sup> The anesthetic chosen appears to be of little influence, although only controlled trials comparing the closely related local anesthetics ropivacaine and bupivacaine were published recently.<sup>165–166</sup>

Local anesthetics alone are sometimes used for labor pain relief *via* epidural catheter. The incidence of nausea and vomiting reported in this setting varies from less than 10%<sup>176</sup> to more than 50%.<sup>177</sup> The severity is also

**Table 2. Effects of Adjunctive Medications on PONV After Epidural Anesthesia**

| Study                                 | Patients, n | Type of Surgery  | Epidural Control | PONV, % | Medication Added | PONV, % | Comments                        |
|---------------------------------------|-------------|------------------|------------------|---------|------------------|---------|---------------------------------|
| Lanz <i>et al.</i> <sup>167</sup>     | 139         | Orthopedic       | Bupivacaine      | 29      | Morphine         | 35      | <i>P</i> = NS                   |
| Gürel <i>et al.</i> <sup>168</sup>    | 79          | Anorectal        | Prilocaine       | 0       | Morphine         | 2       | <i>P</i> = NS                   |
| Rucci <i>et al.</i> <sup>169</sup>    | 80          | Hernia/prostate  | Bupivacaine      | 10      | Fentanyl         | 17      | <i>P</i> = NS                   |
| Engel <i>et al.</i> <sup>170</sup>    | 60          | Orthopedic       | Ropivacaine      | <10     | Clonidine        | <10     | <i>P</i> = NS                   |
| Laishley <i>et al.</i> <sup>171</sup> | 80          | Cesarean section | Bupivacaine      | 45      | Epinephrine      | 35      | Intraoperative, <i>P</i> = NS   |
| Eisenach <i>et al.</i> <sup>172</sup> | 30          | Cesarean section | Bupivacaine      | 72      | Epinephrine      | 53      | Intraoperative, <i>P</i> = NS   |
| Noble <i>et al.</i> <sup>173</sup>    | 45          | Cesarean section | Bupivacaine      | 33      | Fentanyl         | 30      | Intraoperative, <i>P</i> = NS   |
| Vincent <i>et al.</i> <sup>174</sup>  | 60          | Cesarean section | Lidocaine        | 62      | Fentanyl         | 32      | Intraoperative, <i>P</i> < 0.05 |

NS = not significant; PONV = postoperative nausea and vomiting.

variable, with reports ranging from low nausea scores<sup>178</sup> to vomiting rates of 52%.<sup>179</sup>

The same variability is described in reports of epidural anesthesia for cesarean section. Overall frequencies of PONV range between 0%<sup>180</sup> and more than 70%.<sup>175</sup> Chestnut *et al.*<sup>181</sup> reported on the repartition of emetic events during the course of anesthetic induction and surgery, with an incidence of nausea of 21% and vomiting of 0% before delivery, 36% and 15% after delivery, and 36% and 36%, respectively, during the first 4 h postoperatively.<sup>181</sup>

Other investigators differed in their findings, either emphasizing the intraoperative predelivery<sup>182</sup> or postdelivery<sup>177</sup> period as the one at highest risk. Possibly, the use of other medications, such as sodium citrate or uterotonic agents, is responsible for at least part of these differences.

**Epidural Epinephrine.** The epidural injection of epinephrine alone did not cause nausea or vomiting in a study of 15 volunteers.<sup>183</sup> When added to epidural morphine, however, Bromage *et al.*<sup>184</sup> observed "markedly intensified and prolonged" nausea and vomiting in three volunteers, and Collier<sup>185</sup> confirmed this finding by reporting twice the rate of vomiting when epinephrine was combined with epidural morphine in patients undergoing gynecologic surgery. However, this effect could not be duplicated in women undergoing cesarean section.<sup>186</sup> There are many, mostly small, studies conducted in different patient populations where varying epidural solutions were compared with or without epinephrine. The majority did not find a significant difference in PONV whether epinephrine was added or not,<sup>171,173,177,187</sup> although some investigators reported a higher<sup>188,189</sup> or lower<sup>190</sup> incidence with epinephrine admixture. The role of adding epinephrine to epidural local anesthetics is controversial. However, clinical experience suggests avoiding its use whenever possible.

**Epidural Morphine.** Initially, reports of rates of PONV lower than with intravenous morphine stirred enthusiasm for the epidural administration of morphine.<sup>191</sup> However, in a volunteer study using a cross-over design, 10 mg morphine administered epidurally caused nausea in 6 of 10 participants, compared with only 1 case when the same dose was given intravenously.<sup>192</sup> A relation to the morphine dose was suggested in another investigation in volunteers, where 1 of 5 participants experienced nausea after 2 or 4 mg epidural morphine and 5 of 5 participants after a 10-mg dose.<sup>193</sup> In dose-response studies involving patients receiving operative epidural anesthesia, there were no differences in rates of PONV when different morphine doses up to 5 mg were administered.<sup>167,194</sup> Higher doses either did<sup>195</sup> or did not<sup>196</sup> lead to an increased incidence of PONV. Similarly, studies comparing epidural morphine with parenteral opioid analgesic regimens did not show significantly different frequencies of emetic complications,

although the reported incidences vary between 10% and more than 50%.<sup>168,197</sup>

The addition of morphine to local anesthetics for epidural labor analgesia was found to have no clinical advantages. In a trial by Lirzin *et al.*,<sup>198</sup> 11 of 85 parturients given local anesthetics alone (13%) complained of nausea, while the incidence increased to 27 of 83 women (33%) when 4 mg morphine was added. Macdonald *et al.*<sup>199</sup> studied 124 parturients given 0, 2, or 4 mg morphine in addition to bupivacaine for vaginal delivery, with vomiting occurring in 5%, 23%, and 28%, respectively.

Morphine administered epidurally for post-cesarean section pain control led to nausea and vomiting in 39.9% of 4,880 patients studied retrospectively by Fuller *et al.*<sup>200</sup> The incidence of PONV after epidural morphine in patients undergoing cesarean section is usually not different when compared with conventional parenteral opioid analgesia.<sup>201</sup> A significant correlation between morphine dose and PONV incidence has not been established.<sup>180,202</sup>

**Epidural Fentanyl.** The use of lipophilic opioids for operative epidural anesthesia is not very common. Furthermore, recent research questions the advantage of their epidural as compared with systemic administration.<sup>203</sup> Fentanyl injected epidurally in volunteers did provoke nausea in 2 of 12 participants, with no dose-dependent effect observed.<sup>204</sup> In a dose-response trial, Rucci *et al.*<sup>169</sup> studied 80 patients undergoing hernia or prostatic surgery with single-shot epidural anesthesia. Fentanyl (up to 200  $\mu$ g) was added to bupivacaine, and an overall PONV rate of 15% with no difference between groups was observed. Other investigators equally reported no significant differences regarding PONV when fentanyl was added to local anesthetics for operative epidural anesthesia compared with local anesthetics alone,<sup>205,206</sup> a finding also confirmed by metaanalysis.<sup>207</sup> When compared with morphine, epidural fentanyl use was associated with a significantly lower PONV incidence after orthopedic surgery.<sup>208</sup> It is obviously difficult to compare the quality of analgesia reported in the aforementioned studies, but control of pain—when assessed—was rated by the investigators as good to very good.

The addition of fentanyl to local anesthetics for labor pain relief has no significant consequences regarding nausea or vomiting. Some studies show slightly lower<sup>209</sup> or higher incidences, but the difference usually does not reach statistical significance.

Fentanyl administered epidurally during cesarean section had no influence on nausea and vomiting in many trials.<sup>173,210</sup> However, Vincent *et al.*<sup>174</sup> demonstrated a significant decrease in intraoperative postdelivery nausea and vomiting when 100  $\mu$ g fentanyl was given after umbilical clamping. On the contrary, Thomas *et al.*<sup>211</sup> found significantly more nausea when the same amount of fentanyl was administered at induction of epidural anesthesia, but this increase was limited to cases of mild



nausea requiring no treatment. The dose of fentanyl injected was not related to the incidence of emetic sequelae when different amounts up to 100  $\mu\text{g}$  were given by Naulty *et al.*<sup>212</sup> or when 25- and 50- $\mu\text{g}$  doses were used by Yee *et al.*<sup>213</sup> Compared with epidural morphine, fentanyl given at induction was followed by significantly less vomiting.<sup>214</sup> Similarly, the use of fentanyl postoperatively reduced the incidence of PONV compared with either local anesthetics alone,<sup>215</sup> epidural morphine,<sup>216</sup> or parenteral morphine.<sup>217</sup>

**Epidural Sufentanil.** Epidural sufentanil can cause nausea in volunteers to a similar degree than fentanyl, with no clear effect of dosage.<sup>204</sup> Doses of sufentanil up to 50  $\mu\text{g}$  added to epidural lidocaine for knee surgery in 50 patients led to no difference in PONV between groups.<sup>218</sup> Given at the conclusion of surgery in the presence of local anesthetic epidural blockade, the incidence of PONV was similar between groups receiving sufentanil up to 75  $\mu\text{g}$ ,<sup>219</sup> although sufentanil had only variable success in reducing PONV compared with epidural morphine in this setting.<sup>220</sup>

Sufentanil used for labor does not lead to increased emetic sequelae. Vertommen *et al.*<sup>176</sup> reported nausea in 4% and vomiting in 4% of 344 parturients given 10  $\mu\text{g}$  sufentanil in addition to bupivacaine, an incidence not different from the one observed in 318 control subjects given bupivacaine alone. Dose-range studies found no relation between PONV and sufentanil dose when up to 30  $\mu\text{g}$  sufentanil was administered.<sup>221</sup> Not surprisingly, there is also no difference in the incidence of PONV when sufentanil is compared with fentanyl as an adjuvant to local anesthetic for epidural labor analgesia.<sup>220</sup>

When sufentanil is administered in the context of cesarean section, there appears to exist no difference in the frequency of PONV as compared with local anesthetics alone.<sup>222</sup> Madej *et al.*<sup>223</sup> observed a significant increase in emetic sequelae, however, when sufentanil doses greater than 20  $\mu\text{g}$  were administered at the onset of anesthesia compared with lower doses or 100  $\mu\text{g}$  fentanyl.<sup>223</sup> This effect could not be observed when different doses of sufentanil were used at the end of surgery for initial postoperative pain control.<sup>224</sup> Compared with intraoperative morphine, the application of sufentanil was followed by significantly less PONV.<sup>214</sup> When given at the end of surgery, however, no difference was observed.<sup>225</sup>

**Meperidine as an Epidural Agent.** In contrast to spinal anesthesia, epidurally applied meperidine did not increase the incidence of PONV in joint replacement surgery.<sup>208</sup> In parturients, its use was associated with a trend to higher rates of nausea and vomiting.<sup>226</sup> In women undergoing cesarean section, epidural meperidine is not followed by undue nausea and vomiting, although a dose of 100 mg was found to cause more nausea than lower doses.<sup>227</sup> Meperidine also compared favorably with other epidural opioids in this context,

resulting in less PONV than morphine use<sup>228</sup> and a similar incidence to fentanyl.<sup>229</sup>

In conclusion, volunteer studies and clinical evidence confirm the potential of epidural opioids to induce nausea and vomiting. Morphine appears to carry the highest risk, while fentanyl or sufentanil have fewer emetic sequelae. Because of little available data, it is difficult to position meperidine in this regard, but it seems to lie closer to the lipophilic opioids than to morphine.

**Epidural Clonidine.** Epidural clonidine does not provoke nausea or vomiting in volunteers.<sup>183,230</sup> The experience in patients with chronic pain, where clonidine is infused over weeks, also suggests that it is not the cause of such side effects.<sup>231</sup> In a dose-range trial, Engel *et al.*<sup>170</sup> studied the addition of up to 150  $\mu\text{g}$  clonidine to ropivacaine epidural anesthesia for elective hip replacement surgery in 60 patients and could not document a difference in PONV between groups.<sup>170</sup> When added to local anesthetic at the end of hip surgery during epidural blockade for postoperative pain control, clonidine actually lowered PONV rates in another trial.<sup>232</sup> Overall, there is no evidence to date that could implicate epidural clonidine as a significant cause of PONV.

This observation is also made when clonidine is added to various solutions to provide labor pain relief<sup>233</sup> or administered for post-cesarean section pain management.<sup>234</sup>

**Epidural Neostigmine.** Experience with epidural neostigmine is limited. Observations in patients with cancer pain showed promise that its use might be followed by less nausea and vomiting than the intrathecal application.<sup>235</sup> In an investigation randomizing 48 patients to receive 0, 1, 2, or 4  $\mu\text{g}/\text{kg}$  epidural neostigmine in addition to a bupivacaine spinal anesthetic for minor knee surgery, no case of intraoperative nausea or vomiting was observed, and postoperative nausea scores did not differ between groups.<sup>236</sup> These results need to be corroborated by further studies before epidural neostigmine can be recommended for everyday practice.

**Spinal versus Epidural Anesthesia.** Several aspects distinguish epidural and spinal anesthesia. Among others, the slower onset of epidural anesthesia might favor better hemodynamic control. On the other hand, the higher density of spinal anesthetic blockade potentially provides superior anesthetic quality with less need for additional neuraxial or systemic medications. These factors potentially influence the frequency of emetic events.

The direct comparison of the two approaches has led to mixed results.<sup>237-239</sup> In a trial involving 192 patients undergoing general surgery, single-shot spinal anesthesia with plain bupivacaine resulted in similar less PONV as lidocaine epidural anesthesia (17 vs. 22%).<sup>238</sup> When regional anesthesia was continued into the postoperative period using local anesthetics without additives in a study of 102 patients after hip surgery, significantly fewer patients experienced nausea after continuous spi-

**Table 3. Peripheral Nerve Blockade versus Other Anesthetic Techniques and PONV**

| Study                                 | Patients, n | Type of Surgery  | Block         | PONV, % | Comparison | PONV, % | Comments                                   |
|---------------------------------------|-------------|------------------|---------------|---------|------------|---------|--------------------------------------------|
| Pusch <i>et al.</i> <sup>6</sup>      | 86          | Breast           | Paravertebral | 9       | General    | 29      | Vomiting only, $P < 0.05$                  |
| Klein <i>et al.</i> <sup>246</sup>    | 245         | Breast           | Paravertebral | 19      | General    | 39      | Treatment only, $P < 0.05$ ; retrospective |
| Szmuk <i>et al.</i> <sup>247</sup>    | 250         | Circumcision     | Penis block   | 6       | General    | 27      | Adult patients, $P$ value not shown        |
| Vloka <i>et al.</i> <sup>248</sup>    | 68          | Varicose veins   | Femoral       | 3       | Spinal     | 6       | $P = \text{NS}$                            |
| Patel <i>et al.</i> <sup>249</sup>    | 90          | Knee arthroscopy | 3 in 1        | 3       | General    | 17      | $P = \text{NS}$                            |
| Chilvers <i>et al.</i> <sup>250</sup> | 185         | Hand             | IVRA          | 0       | General    | 5       | Vomiting only, $P < 0.05$                  |

IVRA = intravenous regional anesthesia; NS = not significant; PONV = postoperative nausea and vomiting.

nal versus epidural anesthesia (41 vs. 76%).<sup>240</sup> In women undergoing cesarean section, spinal or combined spinal-epidural anesthesia was followed intraoperatively either by a higher need for antiemetics,<sup>241</sup> no difference in PONV,<sup>242</sup> or less nausea and vomiting<sup>239</sup> than epidural anesthesia in different investigations.

The role of intrathecal compared with epidural administration of opioids regarding PONV is not clear. Trials in different patient populations found no significant differences,<sup>243</sup> but many studies suffer from retrospective design or the use of nonequivalent opioid doses. When Hallworth *et al.*<sup>244</sup> administered diamorphine in an equipotent dose (0.25 mg intrathecally or 5 mg epidurally) to patients undergoing cesarean section, they found significantly less PONV in the spinal group compared with the epidural group (4 vs. 24%), which the investigators explained by higher systemic opioid uptake after epidural injection.<sup>244</sup>

In laboring women, the use of intrathecal opioids alone has also been compared with epidural analgesia. While spinal morphine<sup>245</sup> was found to cause a significantly higher incidence of nausea and vomiting than epidural local anesthetics, intrathecal sufentanil compared favorably to different epidural analgesic regimens.<sup>246</sup>

**Peripheral Nerve Blockade.** Combining various block and surgery types, older prospective studies found an incidence of nausea and vomiting of 4.3<sup>77</sup> to 8.8%<sup>78</sup> after peripheral regional anesthesia. Such blocks often compare favorably with alternative methods of anesthesia regarding PONV (table 3).<sup>246-250</sup> In current practice, peripheral blocks are often used for minor surgery in outpatients, and follow-up time in studies is frequently limited. Furthermore, it is common that these patients are given additional systemic medications for sedation, among those benzodiazepines, opioids, or propofol. It is

not surprising, therefore, that the frequency of nausea and vomiting, if reported at all, varies considerably in different investigations.

**Blocks for Upper Extremity Surgery.** Blockade of the nerves to the upper extremity can be achieved at different levels, such as the interscalene, supraclavicular, infraclavicular, or axillary location. The incidence of PONV is usually very low after pure local anesthetic block. Hickey *et al.*<sup>251</sup> administered systemic morphine and midazolam to their patients and reported an incidence of nausea of 10% and vomiting of 6% within 3 h after block completion.

The addition of other medications to the local anesthetic block solution has increased in popularity (table 4).<sup>252-256</sup> Different opioids have been used, and their administration was usually not followed by higher PONV rates. Nonetheless, prolonged infusion by means of a plexus catheter led to a significantly higher incidence of nausea compared with local anesthetic infusion alone.<sup>73</sup> Also, Bouaziz *et al.*<sup>254</sup> observed a tendency for a dose-related increase in nausea after the addition of sufentanil to mepivacaine in 92 patients receiving an axillary plexus block, although they rated all episodes as mild and of short duration. Clonidine added to local anesthetics is usually devoid of emetic side effects. Episodes of nausea have been reported, however, secondary to bradycardia and hypotension attributed to systemic absorption after injection of clonidine into the plexus diffusion space.<sup>257</sup> Bouaziz *et al.*<sup>256</sup> compared the effects of 500  $\mu\text{g}$  neostigmine given with the local anesthetic or given systemically with a control group. The frequency of all side effects of gastrointestinal origin was similar between the groups in which neostigmine was given locally or systemically and was significantly higher than

**Table 4. Medications Added to Brachial Plexus Anesthesia and PONV**

| Study                                 | Patients, n | Control               | PONV, % | Medication Added | PONV, % | Comments         |
|---------------------------------------|-------------|-----------------------|---------|------------------|---------|------------------|
| Racz <i>et al.</i> <sup>252</sup>     | 40          | Lidocaine-bupivacaine | 11      | Morphine         | 19      | $P = \text{NS}$  |
| Gormley <i>et al.</i> <sup>253</sup>  | 60          | Lidocaine             | 0       | Alfentanil       | 4       | $P = \text{NS}$  |
| Bouaziz <i>et al.</i> <sup>254</sup>  | 92          | Mepivacaine           | 5       | Sufentanil       | 17      | $P = \text{TNS}$ |
| Erlacher <i>et al.</i> <sup>255</sup> | 40          | Ropivacaine           | 0       | Clonidine        | 0       | $P = \text{NS}$  |
| Bouaziz <i>et al.</i> <sup>256</sup>  | 69          | Mepivacaine           | 0       | Neostigmine      | 17      | $P < 0.05$       |

NS = not significant; PONV = postoperative nausea and vomiting.

in the control group. Nausea and vomiting occurred only in patients receiving neostigmine.

For short procedures of the upper and, rarely, lower extremity, intravenous regional anesthesia remains popular. Limited surgery, short operating times, and quick recovery after tourniquet release are also factors leading to low PONV risk. Consequently, reported rates of nausea and vomiting are low, ranging between 0 and 10% after injection of local anesthetic alone. There is no evidence that the choice of local anesthetic would influence PONV rate.<sup>258-259</sup> The addition of opioids to the solution to be injected has been repeatedly followed by increased nausea after tourniquet deflation, and their indication is questionable.<sup>260,261</sup> Similarly, the substitution of local anesthetic with meperidine caused a significantly higher incidence of PONV in volunteers.<sup>262</sup> When different doses of meperidine were added to mepivacaine, a dose-dependent increase in PONV was observed.<sup>263</sup> Clonidine admixture, on the other hand, seems devoid of such consequences, at least as long as hemodynamic stability is not compromised after cuff release.<sup>264</sup>

**Blocks for Truncal Surgery.** Breast surgery with general anesthesia is known to pose a high risk of PONV.<sup>265</sup> Therefore, alternative techniques have been tried, such as intercostal nerve blocks and multiple- or single-injection paravertebral blocks. Problems, including time-consuming performance or considerable failure rates, are common. Furthermore, most patients require additional intraoperative sedation. Nonetheless, the results regarding PONV are encouraging. Several investigators reported significantly lower rates of PONV when comparing regional and general anesthetic techniques.<sup>6,246</sup> Klein *et al.*<sup>246</sup> achieved nausea scores after paravertebral blockade that were less than half of those seen after general anesthesia. Lumbar paravertebral blockade used for inguinal herniorrhaphy was accompanied by nausea in 15% and vomiting in 5% of patients.<sup>266</sup>

**Blocks for Lower Extremity Surgery.** Surgical anesthesia of the lower extremity by peripheral blockade usually requires the blockade of multiple nerves and is therefore often considered cumbersome and time-consuming to perform. Nonetheless, combinations such as femoral-sciatic or saphenous-popliteal block have regained interest, especially for ambulatory surgery.

These blocks are generally followed by low rates of nausea and vomiting. Mansour *et al.*<sup>267</sup> reported very low emetic scores after major knee surgery using a combination of lumbar plexus and sciatic nerve block, with more than 96% of patients symptom-free at any observation time. In vein-stripping surgery, a femoral plus genitofemoral nerve block resulted in a PONV rate of 3%, which compared favorably with the 6.3% rate observed in a comparable spinal anesthesia group.<sup>248</sup> Similar experience has been published when sciatic-femoral blockade was compared with spinal anesthesia for knee arthroscopy.<sup>268</sup> For foot surgery, Singelyn *et*

*al.*<sup>269</sup> used a femoral-popliteal block and continued the popliteal block into the postoperative period by means of a catheter. The incidence of nausea and vomiting of 5% was significantly lower than in a historical control group that received general anesthesia followed by morphine patient-controlled analgesia (49%). A similar approach also proved advantageous for short saphenous vein stripping, although no difference in PONV was seen compared with spinal anesthesia.<sup>270</sup> The use of adjunctive medications added to the local anesthetic has not been well studied in lower extremity anesthesia. Low doses of fentanyl mixed with local anesthetic neither increased efficacy nor side effects.<sup>271</sup> Clonidine, on the other hand, was reported to be beneficial without an obvious increase in nausea or other adverse events.<sup>272</sup>

**Continuous Peripheral Nerve Blockade for Postoperative Analgesia.** Continuous peripheral nerve blocks have not found the same widespread use as continuous epidural blocks. For postoperative epidural analgesia, however, it has been noted that PONV rates were significantly lower over several days compared with morphine-based patient-controlled analgesia.<sup>273</sup> Furthermore, the concept of opioid-free epidural regimens have shown additional benefit, and the same holds true for continuous peripheral nerve blocks (table 5).<sup>70,274-279</sup>

In upper extremity analgesia, Wajima *et al.*<sup>70</sup> showed that operative axillary plexus blockade with postoperative continuous opioid-free plexus analgesia can result in complete absence of emetic sequelae. Borgeat *et al.* compared different opioid-free interscalene analgesic regimens with nicomorphine patient-controlled analgesia after shoulder surgery with combined interscalene and propofol-based general anesthesia. They consistently found significantly lower PONV rates in the regional analgesia groups.<sup>274-276</sup> Other investigators reported higher incidences of PONV in similar settings, but differences in study design might account for this. For example, Singelyn *et al.*<sup>277</sup> administered an inhalational general anesthetic and used a sufentanil-containing solution for plexus analgesia. The use of inhalational general anesthesia and the small study size could explain why Lehtipalo *et al.*<sup>278</sup> were unable to demonstrate a difference in PONV rates comparing opioid-free interscalene analgesia with morphine patient-controlled analgesia.

For analgesia after surgery of the lower extremity during inhalational general anesthesia, Capdevila *et al.*<sup>65</sup> used a continuous femoral nerve block with a lidocaine-morphine-clonidine mixture and found a significantly reduced the incidence of PONV at 24 h compared with morphine patient-controlled analgesia. Similarly, Schultz *et al.*<sup>280</sup> reported a significant decrease in PONV rates when postoperative analgesia was administered after knee surgery by a bupivacaine continuous lumbar plexus block instead of epidural morphine. Singelyn *et al.*<sup>269</sup> could reduce PONV by 90% providing analgesia after foot surgery by means of a popliteal catheter instead of



**Table 5. Effects of Continuous Peripheral Nerve Blockade for Postoperative Analgesia on PONV**

| Study                                  | Patients, n | Type of Surgery | Operative Anesthesia                    | Postoperative Peripheral Blockade                                     | PONV, % | Postoperative Control                                | PONV, % | Comments                                            |
|----------------------------------------|-------------|-----------------|-----------------------------------------|-----------------------------------------------------------------------|---------|------------------------------------------------------|---------|-----------------------------------------------------|
| Wajima <i>et al.</i> <sup>70</sup>     | 23          | Arm             | Axillary plexus                         | Axillary plexus<br>Mepivacaine                                        | 0       | Axillary plexus<br>Butorphanol                       | 50      | $P < 0.05$                                          |
| Borgeat <i>et al.</i> <sup>274</sup>   | 35          | Shoulder        | Interscalene plexus<br>ITN (propofol)   | Interscalene plexus<br>Ropivacaine                                    | 3       | PCA Nicomorphine                                     | 35      | $P < 0.05$                                          |
| Borgeat <i>et al.</i> <sup>275</sup>   | 60          | Shoulder        | Interscalene plexus<br>ITN (propofol)   | Interscalene plexus<br>(PCIA)<br>Ropivacaine                          | 10      | PCA Nicomorphine                                     | 46      | $P < 0.05$                                          |
| Borgeat <i>et al.</i> <sup>276</sup>   | 40          | Shoulder        | Interscalene plexus<br>ITN (propofol)   | Interscalene plexus<br>(PCIA)<br>Bupivacaine                          | 15      | PCA Nicomorphine                                     | 30      | $P = \text{NS}$ , vomiting<br>0 vs. 25%, $P < 0.05$ |
| Singelyn <i>et al.</i> <sup>277</sup>  | 40          | Shoulder        | Interscalene plexus<br>ITN (inhalation) | Interscalene plexus<br>(PCIA)<br>Bupivacaine-sufentanil-<br>clonidine | 10      | Interscalene<br>Bupivacaine-sufentanil-<br>clonidine | 25      | $P = \text{NS}$                                     |
| Lehtipalo <i>et al.</i> <sup>278</sup> | 20          | Shoulder        | ITN (inhalation)                        | Interscalene plexus<br>Bupivacaine                                    | 20      | PCA Morphine                                         | 30      | $P = \text{NS}$                                     |
| Capdevila <i>et al.</i> <sup>65</sup>  | 39          | Knee            | ITN (inhalation)                        | Femoral block<br>Lidocaine-morphine-<br>clonidine                     | 5       | PCA Morphine                                         | 21      | $P < 0.05$<br>(at 24 h<br>postoperatively)          |
| Singelyn <i>et al.</i> <sup>279</sup>  | 30          | Knee            | Lumbar plexus<br>ITN (inhalation)       | Lumbar plexus<br>Bupivacaine-sufentanil-<br>clonidine                 | 33      | PCA Morphine                                         | 40      | $P = \text{NS}$                                     |
| Singelyn <i>et al.</i> <sup>269</sup>  | 105         | Foot            | Popliteal block<br>ITN (control group)  | Popliteal block                                                       | 5       | PCA Morphine                                         | 49      | $P < 0.05$<br>Historic controls                     |

ITN = intubation general anesthesia; NS = not significant; PCA = patient-controlled analgesia; PCIA = patient-controlled interscalene analgesia; PONV = postoperative nausea and vomiting.

by morphine patient-controlled analgesia. In contrast, Ganapathy *et al.* could not detect a significant difference in PONV whether a continuous femoral block with bupivacaine or morphine patient-controlled analgesia were used after knee arthroplasty during spinal anesthesia, but the patients in the regional group required as much systemic morphine in the first day as the patients in the patient-controlled analgesia group.<sup>281</sup>

In conclusion, continuous peripheral nerve blocks provide a promising tool to reduce PONV compared with standard analgesic techniques. Further investigations are warranted to define the appropriate indications and to find the optimal anesthetic solution to be used.

## Conclusion

Postoperative nausea and vomiting remains a significant problem for both patients and clinicians. Most investigations of PONV have been conducted in the context of general anesthesia, but there is no evidence that fundamental differences exist regarding mechanisms and patient-related risk factors when regional anesthesia is considered. We have to admit that in the majority of the studies dealing with this question, PONV has rarely been the primary outcome variable, which is a shortcoming of this review.

The common assumption that regional anesthesia is associated with less PONV than general anesthesia is generally correct, although newer general anesthetic

agents (e.g., propofol) have narrowed the gap. However, some procedures such as cesarean section or major orthopedic surgeries are followed by high PONV rates after regional anesthetic techniques. While nausea and vomiting are very rarely life-threatening, their impact on patients is negative enough to impose a deliberate search for the most appropriate anesthetic technique and to justify antiemetic strategies in high-risk patient groups.

The choice of agents for premedication and intraoperative sedation may significantly impact on the incidence of PONV and should be made with this aspect in mind. Avoidance of hypotension, adequate hydration, and the administration of supplemental oxygen are part of an antiemetic plan. The addition of adjunctive medications to the local anesthetic can increase, decrease, or leave unchanged the rate of emetic sequelae and should be considered accordingly. While clonidine appears harmless, neostigmine must be cautioned against. Opioids have to be differentiated according to type and setting. In spinal anesthesia, meperidine should be avoided, as should morphine in lesser surgeries where little postoperative pain is expected. Morphine for epidural anesthesia should be replaced by fentanyl or sufentanil, as these substances appear to carry the lowest PONV risk of the opioids in neuraxial anesthesia. The use of opioids in patients undergoing peripheral regional anesthesia remains controversial, but their potential to cause PONV should be taken into consideration. A quantitative analysis of the risk of PONV when opioids are added to local

anesthetics would have been interesting to evaluate, but was not realistic in this review because of the large protocol heterogeneity.

At least in more extensive surgical cases, regional administration of opioids does not seem to increase PONV compared with the use of systemic opioids. In some instances, such as cesarean section, regional opioids may even lower PONV rates. Furthermore, the continuation of regional analgesia into the postoperative period by means of catheter techniques offers a possibility of reducing PONV compared with opioid-based analgesic regimens. Indeed, in appropriate settings, these techniques can provide excellent pain control without the administration of opioids offering the best conditions to prevent PONV.

In the ether era, nausea and vomiting were considered almost unavoidable companions of anesthesia. While a carefully planned regional anesthetic will not completely banish them, it offers to date the best chance not to cross their path and to avoid the "big little problem" of anesthesia.<sup>282</sup>

In summary, early and efficient rehabilitation are the new requirements of modern surgery, especially in orthopedics. This evolution has resulted in a renewed interest in regional anesthesia. The development of the continuous perineural catheter in particular has led to better postoperative pain control associated with a large reduction of the incidence of PONV. To take advantage of these techniques, future research needs to identify the risk factors for PONV that are specifically linked to regional anesthesia and to find the most appropriate adjuvants and sedative regimens to supplement neural or peripheral block to reduce as much as possible the systemic use of opioids.

## References

- Hines R, Barash PG, Watrous G, O'Connor T: Complications occurring in the postanesthesia care unit: A survey. *Anesth Analg* 1992; 74:503-9
- Myles PS, Williams DL, Hendrata M, Anderson H, Weeks AM: Patient satisfaction after anaesthesia and surgery: Results of a prospective survey of 10811 patients. *Br J Anaesth* 2000; 84:6-10
- Pavlin DJ, Rapp SE, Polissar NL, Malmgren JA, Koerschgen M, Keyes H: Factors affecting discharge time in adult outpatients. *Anesth Analg* 1998; 87:816-26
- Fortier J, Chung F: Unanticipated admission after ambulatory surgery: A prospective study. *Can J Anaesth* 1998; 45:612-9
- Richardson MG, Dooley JW: The effects of general versus epidural anesthesia for outpatient extracorporeal shock wave lithotripsy. *Anesth Analg* 1998; 86:1214-8
- Pusch F, Freitag H, Weinstabl C, Obwegeser R, Huber E, Wildling E: Single-injection paravertebral block compared to general anaesthesia in breast surgery. *Acta Anaesthesiol Scand* 1999; 43:770-4
- Wulf H, Biscopio J, Beland B, Bachmann-Mennenga B, Motsch J: Ropivacaine epidural anesthesia and analgesia versus general anesthesia and intravenous patient-controlled analgesia with morphine in the perioperative management of hip replacement. *Anesth Analg* 1999; 89:111-6
- Standl T, Eckert S, Esch SA: Postoperative complaints after spinal and thiopentone-isoflurane anaesthesia in patients undergoing orthopaedic surgery: Spinal versus general anaesthesia. *Acta Anaesthesiol Scand* 1996; 40:222-6
- Watcha MF, White PF: Postoperative nausea and vomiting: Its etiology, treatment, and prevention. *ANESTHESIOLOGY* 1992; 77:162-84
- Biedler A, Wilhelm W: Postoperative nausea and vomiting. *Anaesthesist* 1998; 47:145-58
- Rawal N: Regional anesthesia for ambulatory surgery: A European survey. *Br J Anaesth* 1995; 74(Suppl):5-6
- Clergue F, Auroy Y, Pequignot F, Jougla E, Lienhard A, Laxenaire MC: French survey of anesthesia in 1996. *ANESTHESIOLOGY* 1999; 91:1509-20
- Klafta JM, Roizen MF: Current understanding of patient's attitudes toward and preparation for anesthesia: A review. *Anesth Analg* 1996; 83:1314-21
- Shevde K, Panagopoulos G: A survey of 800 patients' knowledge, attitudes, and concerns regarding anesthesia. *Anesth Analg* 1991; 73:190-8
- Korttila K: The study of postoperative nausea and vomiting. *Br J Anaesth* 1992; 69:208-35
- Cohen MM, Duncan PG, Deboer DP, Tweed WA: The postoperative interview: Assessing risk factors for nausea and vomiting. *Anesth Analg* 1994; 78:7-16
- Bourke DL: Interpretation of negative results. *Anesth Analg* 1983; 62:1045-6
- Haigh CG, Kaplan LA, Durham JM, Dupeyron JP, Harmer M, Kenny GNC: Nausea and vomiting after gynaecological surgery: A meta-analysis of factors affecting their incidence. *Br J Anaesth* 1993; 71:517-22
- White PF, Watcha MF: Has the use of meta-analysis enhanced our understanding of therapies for postoperative nausea and vomiting? *Anesth Analg* 1999; 88:1200-2
- Tramer MR, Reynolds DJM, More RA, McQuay HJ: Impact of covert duplication on meta-analysis: A case study. *BMJ* 1997; 315:635-40
- Crocker JS, Vandam LD: Concerning nausea and vomiting during spinal anesthesia. *ANESTHESIOLOGY* 1959; 20:587-92
- Carpenter RL, Caplan RA, Brown DL, Stephenson C, Wu R: Incidence and risk factors for side effects of spinal anesthesia. *ANESTHESIOLOGY* 1992; 76:909-16
- Knudsen K, Suurkula MB, Blomberg S, Sjoval J, Edvardsson N: Central nervous and cardiovascular effects of i.v. infusions of ropivacaine, bupivacaine, and placebo in volunteers. *Br J Anaesth* 1997; 78:507-14
- Angst MS, Ramaswamy B, Riley ET, Stanski DR: Lumbar epidural morphine in humans and supraspinal analgesia to experimental heat pain. *ANESTHESIOLOGY* 2000; 92:312-24
- Gjessing J, Tomlin PJ: Postoperative pain control with intrathecal morphine. *Anaesthesia* 1981; 36:268-76
- Gourlay GK, Murphy TM, Plummer JL, Kowalski SR, Cherry DA, Cousins MJ: Pharmacokinetics of fentanyl in lumbar and cervical CSF following lumbar epidural and intravenous administration. *Pain* 1989; 38:253-9
- Hood DD, Eisenach JC, Tuttle R: Phase I safety assessment of intrathecal neostigmine methylsulfate in humans. *ANESTHESIOLOGY* 1995; 82:331-43
- Sjostrom S, Hartvig P, Persson MP, Tamsen A: Pharmacokinetics of epidural morphine and meperidine in humans. *ANESTHESIOLOGY* 1987; 67:877-88
- Laduron PM: Axonal transport of opiate receptors in capsaicin-sensitive neurons. *Brain Res* 1984; 294:157-60
- Dahl JB, Dagaard JJ, Kristoffersen E, Johannsen HV, Dahl JA: Perineural morphine: A comparison with epidural morphine. *Anaesthesia* 1988; 43:463-5
- Dagaard JJ, Dahl JB, Christensen CB: Concentrations of morphine in the cerebrospinal fluid after femoral perineural morphine administration (letter). *Anesth Analg* 1989; 68:413
- Datta S, Alper MH, Ostheimer GW, Weiss JB: Method of ephedrine administration and nausea and hypotension during spinal anesthesia for cesarean section. *ANESTHESIOLOGY* 1982; 56:68-70
- Ratra CK, Badola RP, Bhargava KP: A study of factors concerned in emesis during spinal anaesthesia. *Br J Anaesth* 1972; 44:1208-11
- Racke K, Schworer H: Regulation of serotonin release from the intestinal mucosa. *Pharmacol Res* 1991; 23:13-25
- Hall PA, Bennett A, Wilkes MP, Lewis M: Spinal anaesthesia for caesarean section: Comparison of infusions of phenylephrine and ephedrine. *Br J Anaesth* 1994; 73:471-4
- Kee WDN, Khaw KS, Lee BB, Lau TK, Gin T: A dose-response study of prophylactic intravenous ephedrine for the prevention of hypotension during spinal anesthesia for cesarean delivery. *Anesth Analg* 2000; 90:1390-5
- Vercauteren MP, Coppejans HC, Hoffmann VH, Mertens E, Adriaens HA: Prevention of hypotension by a single 5-mg dose of ephedrine during small-dose spinal anesthesia in prehydrated cesarean delivery patients. *Anesth Analg* 2000; 90:324-7
- Hagemann E, Halvorsen A, Holgersen O, Tveit T, Raeder JC: Intramuscular ephedrine reduces emesis during the first three hours after abdominal hysterectomy. *Acta Anaesthesiol Scand* 2000; 44:107-11
- Liu SS, Carpenter RL, Neal JM: Epidural anesthesia and analgesia: Their role in postoperative outcome. *ANESTHESIOLOGY* 1995; 82:1474-506
- Apfel CC, Greim CA, Haubitz I, Goepfert C, Usadel J, Seifrin P, Roewer N: A risk score to predict the probability of postoperative vomiting in adults. *Acta Anaesthesiol Scand* 1998; 42:495-501
- Sinclair DR, Chung F, Mezei G: Can postoperative nausea and vomiting be predicted? *Anesthesiology* 1999; 91:109-18
- Larsson S, Lundberg D: A prospective survey of postoperative nausea and vomiting with special regard to incidence and relations to patient characteristics, anesthetic routines and surgical procedures. *Acta Anaesthesiol Scand* 1995; 39:539-45
- Koivuranta M, Laara E, Snare L, Alahuhta S: A survey of postoperative nausea and vomiting. *Anaesthesia* 1997; 52:443-9

44. Quinn AC, Brown JB, Wallace PG, Asbury AJ: Studies in postoperative sequelae: Nausea and vomiting—Still a problem. *Anaesthesia* 1994; 49:62-5
45. Kalso E: Effects of intrathecal morphine injected with bupivacaine on pain after orthopaedic surgery. *Br J Anaesth* 1983; 55:415-22
46. Kitamura A, Kon T, Kamiyama M, Ogawa R: Menstrual stage influences postoperative nausea and vomiting following epidural buprenorphine. *Acta Anaesthesiol Scand* 1996; 40:368-71
47. Tryba M.: Choices in sedation: The balanced sedation technique. *Eur J Anaesthesiol* 1996; 13(Suppl):8-12
48. De Kock MF, Pichon G, Scholtes J-L: Intraoperative clonidine enhances postoperative morphine patient-controlled analgesia. *Can J Anaesth* 1992; 39: 537-44
49. Mackenzie N, Grant IS: Comparison of propofol with methohexitone in the provision of anaesthesia for surgery under regional blockade. *Br J Anaesth* 1985; 57:1167-72
50. Kleinschmidt S, Schellhase C, Mertzlufft F: Continuous sedation during spinal anaesthesia: Gamma-hydroxybutyrate vs. propofol. *Eur J Anaesthesiol* 1999; 16:23-30
51. Urquhart ML, White PF: Comparison of sedative infusions during regional anaesthesia: Methohexital, etomidate and midazolam. *Anesth Analg* 1989; 68: 249-54
52. Splinter W, Noel LP, Roberts D, Rhine E, Bonn G, Clarke W: Antiemetic prophylaxis for strabismus surgery. *Can J Ophthalmol* 1994; 19:224-6
53. Splinter WM, Max Neill HB, Menard EA, Rhine EJ, Robers DJ, Gould MH: Midazolam reduces vomiting after tonsillectomy in children. *Can J Anaesth* 1995; 42:201-3
54. Borgeat A, Wilder-Smith OHG, Saiah M, Rifat K: Subhypnotic doses of propofol possess direct antiemetic properties. *Anesth Analg* 1992; 74:539-41
55. Lacroix G, Lessard MR, Trepanier CA: Treatment of postoperative nausea and vomiting: Comparison of propofol, droperidol and metoclopramide. *Can J Anaesth* 1996; 43:115-20
56. Gan TJ, Ginsberg B, Grant AP, Glass PSA: Double-blind, randomized comparison of ondansetron and intraoperative propofol to prevent postoperative nausea and vomiting. *ANESTHESIOLOGY* 1996; 85:1036-42
57. Cecchetto DF, Diab T, Gibson CJ, Gelb AW: The effects of propofol in the area postrema of rats. *Anesth Analg* 2001; 92:934-42
58. White PF, Negus JB: Sedative infusions during local and regional anaesthesia: A comparison of midazolam and propofol. *J Clin Anesth* 1991; 3:32-9
59. Irwin MG, Thompson N, Kenny GNC: Patient-maintained propofol sedation: Assessment of a target-controlled infusion system. *Anaesthesia* 1997; 52: 525-30
60. Andersen R, Krogh K: Pain as a major cause of postoperative nausea. *Can Anaesth Soc J* 1976; 23:366-9
61. Michaloliakou C, Chung F, Sharma S: Preoperative multimodal analgesia facilitates recovery after ambulatory laparoscopic cholecystectomy. *Anesth Analg* 1996; 82:44-51
62. Eriksson H, Tenhunen A, Korttila K: Balanced analgesia improves recovery and outcome after outpatient tubal ligation. *Acta Anaesthesiol Scand* 1996; 40:151-5
63. Fogarty DJ, O'Hanlon JJ, Milligan KR: Intramuscular ketorolac following total hip replacement with spinal anaesthesia and intrathecal morphine. *Acta Anaesthesiol Scand* 1995; 39:191-4
64. Sun HL, Wu CC, Lin MS, Chang CF, Mok MS: Combination of low-dose epidural morphine and intramuscular diclofenac sodium in postcesarean analgesia. *Anesth Analg* 1992; 75:64-8
65. Capdevila X, Barthelet Y, Biboulet P, Ryckwaert Y, Rubenovitch J, d'Athis F: Effects of perioperative analgesic technique on the surgical outcome and duration of rehabilitation after major knee surgery. *ANESTHESIOLOGY* 1999; 91:8-15
66. Raj PP, Knarr DC, Vigdorth E, Denson DD, Pither CE, Hartrick CT, Hopson CN, Edstrom HH: Comparison of continuous epidural infusion of a local anesthetic and administration of systemic narcotics in the management of pain after total knee replacement surgery. *Anesth Analg* 1987; 66:401-6
67. Klasen JA, Opitz SA, Melzer C, Thiel A, Hempelmann G: Intraarticular, epidural, and intravenous analgesia after total knee arthroplasty. *Acta Anaesthesiol Scand* 1999; 43:1021-6
68. Allen HW, Liu SS, Ware PD, Nairn CS, Ownes BD: Peripheral nerve blocks improve analgesia after total knee replacement surgery. *Anesth Analg* 1998; 87:93-7
69. Callesen T, Schouenborg L, Nielsen D, Guldager H, Kehlet H: Combined epidural-spinal opioid-free anaesthesia and analgesia for hysterectomy. *Br J Anaesth* 1999; 82:881-5
70. Wajima Z, Shitara T, Nakajima Y, Kim C, Kobayashi N, Kadohira H, Adachi H, Ishikawa G, Kaneko K, Inoue T, Ogawa R: Comparison of continuous brachial plexus infusion of butorphanol, mepivacaine and mepivacaine-butorphanol mixtures for postoperative analgesia. *Br J Anaesth* 1995; 75:548-51
71. Armand S, Langlade A, Boutros A, Lobjoit K, Monrigal C, Ramboatiana R, Rauss A, Bonnet F: Meta-analysis of the efficacy of extradural clonidine to relieve postoperative pain: An impossible task. *Br J Anaesth* 1998; 81:126-34
72. Bergeron L, Girard M, Drolet P, Grenier Y, Le Truong HH, Boucher C: Spinal procaine with and without epinephrine and its relation to transient radicular irritation. *Can J Anesth* 1999; 46:846-9
73. Grace D, Bunting H, Milligan KR, Fee JPH: Postoperative analgesia after co-administration of clonidine and morphine by the intrathecal route in patients undergoing hip replacement. *Anesth Analg* 1995; 80:86-91
74. Dent SJ, Ramachandra V, Stephen CR: Postoperative vomiting: Incidence, analysis and therapeutic measures in 3000 patients. *ANESTHESIOLOGY* 1955; 16: 564-72
75. Bonica JJ, Crepps W, Monk B, Bennett B: Postanesthetic nausea, retching and vomiting: Evaluation of Cyclizine (Marezine) suppositories for treatment. *ANESTHESIOLOGY* 1958; 19:532-40
76. Bang-Vojdanovski B: 10 years of spinal anesthesia in infants and children for orthopedic surgery: Our clinical experience. *Anesthesist* 1996; 45:271-7
77. Kokki H, Hendolin H, Vainio J, Partanen J: Pediatric surgery: A comparison of spinal anesthesia and general anesthesia. *Anesthesist* 1992; 41:765-8
78. Skretting P, Vaagenes P, Sundnes KO, Edstrom HH, Lind B: Subarachnoid anaesthesia: Comparison of hyperbaric solutions of bupivacaine and amethocaine. *Br J Anaesth* 1984; 56:155-9
79. McDonald SB, Liu SS, Kopacz DJ, Stephenson CA: Hyperbaric spinal ropivacaine: A comparison to bupivacaine in volunteers. *ANESTHESIOLOGY* 1999; 90:971-7
80. Hodgson PS, Liu SS, Batra MS, Gras TW, Pollock JE, Neal JM: Procaine compared to lidocaine for incidence of transient neurologic symptoms. *Reg Anesth Pain Med* 2000; 25:218-22
81. Sheskey MC, Rocco AG, Bizzarrischmid M, Francis DM, Edstrom H, Covino BG: A dose-response study of bupivacaine for spinal anesthesia. *Anesth Analg* 1983; 62:931-5
82. Povey HM, Olsen PA, Pihl H, Jacobsen J: High dose spinal anaesthesia with glucose free 0.5% bupivacaine 25 and 30mg. *Acta Anaesthesiol Scand* 1995; 39:457-61
83. Pawlowski J, Sukhani R, Pappas AL, Kim KM, Lurie J, Gunnerson H, Corsino A, Frey K, Tonino P: The anesthetic and recovery profile of two doses (60 and 80 mg) of plain mepivacaine for ambulatory spinal anesthesia. *Anesth Analg* 2000; 91:580-4
84. Randalls B, Broadway JW, Browne DA, Morgan BM: Comparison of four subarachnoid solutions in a needle-through-needle technique for elective caesarean section. *Br J Anaesth* 1991; 66:314-8
85. Campbell DC, Banner R, Crone LA, GoreHickman W, Yip RW: Addition of epinephrine to intrathecal bupivacaine and sufentanil for ambulatory labor analgesia. *ANESTHESIOLOGY* 1997; 86:525-31
86. Goyagi T, Nishikawa T: The addition of epinephrine enhances postoperative analgesia by intrathecal morphine. *Anesth Analg* 1995; 81:508-13
87. Acalovschi I, Bodolea C, Manoiu C: Spinal anesthesia with meperidine—Effects of added alpha-adrenergic agonists: Epinephrine versus clonidine. *Anesth Analg* 1997; 84:1333-9
88. Gautier PE, Debry F, Fanard L, VanSteenberge A, Hody JL: Ambulatory combined spinal-epidural analgesia for labor: Influence of epinephrine on bupivacaine-sufentanil combination. *Reg Anesth* 1997; 22:143-9
89. Abouleish E, Rawal N, Tobonrandall B, Riveraweiss M, Meyer B, Wu A, Rashad MN: A clinical and laboratory study to compare the addition of 0.2mg of morphine, 0.2mg of epinephrine, or their combination to hyperbaric bupivacaine for spinal anesthesia in cesarean section. *Anesth Analg* 1993; 77:457-62
90. Jenkins LC, Lakay D: Central mechanism of vomiting related to catecholamine response: Anaesthetic implication. *Can Anaesth Soc J* 1971; 18:434-41
91. Bailey PL, Rhondeau S, Schafer PG, Lu JK, Timmins BS, Foster W, Pace NL, Stanley TH: Dose-response pharmacology of intrathecal morphine in human volunteers. *ANESTHESIOLOGY* 1993; 79:49-59
92. Jacobson L, Chabal C, Brody MC: A dose-response study of intrathecal morphine: Efficacy, duration, optimal dose, and side effects. *Anesth Analg* 1988; 67:1082-8
93. Yamaguchi H, Watanabe S, Fukuda T, Takahashi H, Motokawa K, Ishizawa Y: Minimal effective dose of intrathecal morphine for pain relief following transabdominal hysterectomy. *Anesth Analg* 1989; 68:537-40
94. Weber EWG, Slappendel R, Gielen MJM, Dirksen R: Intrathecal addition of morphine to bupivacaine is not the cause of postoperative nausea and vomiting. *Reg Anesth Pain Med* 1998; 23:81-6
95. Cunningham AJ, McKenna JA, Skene DS: Single injection spinal anaesthesia with amethocaine and morphine for transurethral prostatectomy. *Br J Anaesth* 1983; 55:423-6
96. Kirson LE, Goldman JM, Slover RB: Low-dose intrathecal morphine for postoperative pain control in patients undergoing transurethral resection of the prostate. *ANESTHESIOLOGY* 1989; 71:192-5
97. Abboud TK, Shnider SM, Dailey PA, Raya JA, Sarkis F, Grobler NM, Sadri S, Khoo SS, DeSousa B, Baysinger CL: Intrathecal administration of hyperbaric morphine for the relief of pain in labour. *Br J Anaesth* 1984; 56:1351-60
98. Baraka A, Noueihid R, Hajj S: Intrathecal injection of morphine for obstetric analgesia. *ANESTHESIOLOGY* 1981; 54:136-40
99. Caldwell LE, Rosen MA, Shnider SM: Subarachnoid morphine and fentanyl for labor analgesia: Efficacy and adverse effects. *Reg Anesth* 1994; 19:2-8
100. Yeh HM, Chen LK, Shyu MK, Lin CJ, Sun WZ, Wang MJ, Mok MS, Tsai SK: The addition of morphine prolongs fentanyl-bupivacaine spinal analgesia for the relief of labor pain. *Anesth Analg* 2001; 92:665-8
101. Abouleish E, Rawal N, Fallon K, Hernandez D: Combined intrathecal morphine and bupivacaine for cesarean section. *Anesth Analg* 1988; 67:370-4
102. Rosaeg OP, Lui ACP, Cicutti NJ, Bragg PR, Crossan ML, Krepski B:



Peri-operative multimodal pain therapy for caesarean section: Analgesia and fitness for discharge. *Can J Anaesth* 1997; 44:803-9

103. Milner AR, Bogod DG, Harwood RJ: Intrathecal administration of morphine for elective caesarean section: A comparison between 0.1mg and 0.2mg. *Anaesthesia* 1996; 51:871-3

104. Yang T, Breen TW, Archer D, Fick G: Comparison of 0.25mg and 0.1mg intrathecal morphine for analgesia after caesarean section. *Can J Anesth* 1999; 46:856-60

105. Cardoso MMSC, Carvalho JCA, Amaro AR, Prado AA, Cappelli EL: Small doses of intrathecal morphine combined with systemic diclofenac for postoperative pain control after caesarean delivery. *Anesth Analg* 1998; 86:538-41

106. Dahl JB, Jeppesen IS, Jorgensen H, Wetterslev J, Moeniche S: Intraoperative and postoperative analgesic efficacy and adverse effects of intrathecal opioids in patients undergoing caesarean section with spinal anesthesia: A qualitative and quantitative systematic review of randomized controlled trials. *ANESTHESIOLOGY* 1999; 91:1919-27

107. Liu S, Chiu AA, Carpenter RL, Mulroy MF, Allen HM, Neal JM, Pollock JE: Fentanyl prolongs lidocaine spinal anesthesia without prolonging recovery. *Anesth Analg* 1995; 80:730-4

108. Reuben SS, Dunn SM, Duprat KM, O'Sullivan P: An intrathecal fentanyl dose-response study in lower extremity revascularization procedures. *ANESTHESIOLOGY* 1994; 81:1371-5

109. Vaghadia H, McLeod DH, Mitchell GWE, Merrick PM, Chilvers CR: Small-dose hypobaric lidocaine-fentanyl spinal anesthesia for short duration outpatient laparoscopy: A randomized comparison with conventional dose hyperbaric lidocaine. *Anesth Analg* 1997; 84:59-64

110. Ben-David B, Frankel R, Arzumov N, Marchevsky Y, Volpin G: Minidose bupivacaine-fentanyl spinal anesthesia for surgical repair of hip fracture in the aged. *ANESTHESIOLOGY* 2000; 92:6-10

111. Michaloudis D, Petrou A, Bakos P, Chatzimichali A, Kafkalaki K, Papaioannou A, Zeaki M, Flossos A: Continuous spinal anaesthesia/analgesia for the perioperative management of high-risk patients. *Eur J Anaesthesiol* 2000; 17: 239-47

112. Niemi L, Pitkanen MT, Tuominen MK, Rosenberg PH: Comparison of intrathecal fentanyl with intrathecal morphine infusion or bolus for postoperative pain relief after hip arthroplasty. *Anesth Analg* 1993; 77:126-30

113. Herman NL, Choi KC, Affleck PJ, Calicott R, Brackin R, Singhal A, Andreasen A, Gadalla F, Fong J, Gomillion MC, Harman JK, Koff HD, Lee SHR, Van Decar TK: Analgesia, pruritus, and ventilation exhibit a dose-response relationship in parturients receiving intrathecal fentanyl during labor. *Anesth Analg* 1999; 89:378-83

114. Palmer CM, Cork RC, Hays R, Van Maren G, Alves D: The dose-response relation of intrathecal fentanyl for labor analgesia. *ANESTHESIOLOGY* 1998; 88: 355-61

115. Belzarena SD: Clinical effects of intrathecally administered fentanyl in patients undergoing caesarean section. *Anesth Analg* 1992; 74:653-7

116. Hunt CO, Naulty JS, Bader AM, Hauch MA, Vartikar JV, Datta S, Hertwig LM, Ostheimer GW: Perioperative analgesia with subarachnoid fentanyl-bupivacaine for caesarean delivery. *ANESTHESIOLOGY* 1989; 71:535-40

117. Palmer CM, Voulgaropoulos D, Alves D: Subarachnoid fentanyl augments lidocaine spinal anesthesia for caesarean delivery. *Reg Anesth* 1995; 20:389-94

118. Cooper DW, Lindsay SL, Ryall DM, Kokri MS, Eldabe SS, Lear GA: Does intrathecal fentanyl produce acute cross-tolerance to i.v. morphine? *Br J Anaesth* 1997; 78:311-3

119. Manullang TR, Viscomi CM, Pace NL: Intrathecal fentanyl is superior to intravenous ondansetron for the prevention of perioperative nausea during caesarean delivery with spinal anesthesia. *Anesth Analg* 2000; 90:1162-6

120. Lu JK, Schafer PG, Gardner TL, Pace NL, Zhang J, Niu SY, Stanley TH, Bailey PL: The dose-response pharmacology of intrathecal sufentanil in female volunteers. *Anesth Analg* 1997; 85:372-9

121. Riley ET, Hamilton CL, Cohen SE: Intrathecal sufentanil produces sensory changes without hypotension in male volunteers. *ANESTHESIOLOGY* 1998; 89:73-8

122. Lau WC, Green CR, Faerber GJ, Tait AR, Golembiewski JA: Determination of the effective therapeutic dose of intrathecal sufentanil for extracorporeal shock wave lithotripsy. *Anesth Analg* 1999; 89:889-92

123. Eaton MP, Kristensen EA: Subarachnoid sufentanil for extracorporeal shock lithotripsy. *Reg Anesth* 1997; 22:86-8

124. Fournier R, Van Gessel E, Weber A, Gamulin Z: A comparison of intrathecal analgesia with fentanyl or sufentanil after total hip replacement. *Anesth Analg* 2000; 90:918-22

125. Arkoosh VA, Cooper M, Norris MC, Boxer L, Ferouz F, Silverman NS, Huffnagle HJ, Huffnagle S, Leighton BL: Intrathecal sufentanil dose response in nulliparous patients. *ANESTHESIOLOGY* 1998; 89:364-70

126. Camann W, Abouleish A, Eisenach J, Hood D, Datta S: Intrathecal sufentanil and epidural bupivacaine for labor analgesia: Dose-response of individual agents and in combination. *Reg Anesth Pain Med* 1998; 23:457-62

127. Sia ATH, Chong JL, Chiu JW: Combination of intrathecal sufentanil 10 mcg plus bupivacaine 2.5 mg for labor analgesia: Is half the dose enough? *Anesth Analg* 1999; 88:362-6

128. Wong CA, Scavone BM, Loffredi M, Wang WY, Peaceman AM, Ganchiff JN: The dose-response of intrathecal sufentanil added to bupivacaine for labor analgesia. *ANESTHESIOLOGY* 2000; 92:1553-8

129. Lo WK, Chong JL, Chen LH: Combined spinal epidural for labour anal-

gesia: Duration, efficacy and side effects of adding sufentanil or fentanyl to bupivacaine intrathecally vs plain bupivacaine. *Singapore Med J* 1999; 40:639-43

130. Honet JE, Arkoosh VA, Norris MC, Huffnagle HJ, Silverman NS, Leighton BL: Comparison among intrathecal fentanyl, meperidine, and sufentanil for labor analgesia. *Anesth Analg* 1992; 75:734-9

131. Dahlgren G, Hultstrand C, Jakobsson J, Norman M, Eriksson EW, Martin H: Intrathecal sufentanil, fentanyl, or placebo added to bupivacaine for caesarean section. *Anesth Analg* 1997; 85:1288-93

132. Pan MH, Wei TT, Shieh BS: Comparative analgesic enhancement of alfentanil, fentanyl, and sufentanil to spinal tetracaine anesthesia for caesarean delivery. *Acta Anaesthesiol Sin* 1994; 32:171-6

133. Kee WDN: Intrathecal pethidine: Pharmacology and clinical applications. *Anaesth Intensive Care* 1998; 26:137-46

134. Murto K, Lui ACP, Cicutti N: Adding low dose meperidine to spinal lidocaine prolongs postoperative analgesia. *Can J Anesth* 1999; 46:327-34

135. Nguyen Thi TV, Orliaguet G, Liu N, Delaunay L, Bonnet F: A dose-range study of intrathecal meperidine combined with bupivacaine. *Acta Anaesthesiol Scand* 1992; 36:516-8

136. Patel D, Janardhan Y, Merai B, Robalino J, Shevde K: Comparison of intrathecal meperidine and lidocaine in endoscopic urological procedures. *Can J Anaesth* 1990; 37:567-70

137. Swayze CR, Skerman JH, Walker EB, Sholte FG: Efficacy of subarachnoid meperidine for labor analgesia. *Reg Anesth* 1991; 16:309-13

138. Booth JV, Lindsay DR, Olufolabi AJ, El-Moalem HE, Penning DH, Reynolds JD: Subarachnoid meperidine causes significant nausea and vomiting during labor. *ANESTHESIOLOGY* 2000; 93:418-21

139. Cheun JK, Kim AR: Intrathecal meperidine as the sole agent for caesarean section. *J Korean Med Sci* 1989; 4:135-8

140. Thi TVN, Orliaguet G, Ngu TH, Bonnet F: Spinal anesthesia with meperidine as the sole agent for caesarean delivery. *Reg Anesth* 1994; 19:386-9

141. Dobrydnjov I, Samarutel J: Enhancement of intrathecal lidocaine by addition of local and systemic clonidine. *Acta Anaesthesiol Scand* 1999; 43: 556-62

142. Brunschweiler M, Van Gessel E, Forster A, Bruce A, Gamulin Z: Comparison of clonidine, morphine or placebo mixed with bupivacaine during continuous spinal anesthesia. *Can J Anaesth* 1998; 45:735-40

143. Grace D, Bunting H, Milligan KR, Fee JPH: Postoperative analgesia after co-administration of clonidine and morphine by the intrathecal route in patients undergoing hip replacement. *Anesth Analg* 1995; 80:86-91

144. Chiari A, Lorber C, Eisenach JC, Wildling E, Krenn C, Zavrsky A, Kainz C, Germann P, Klimscha W: Analgesic and hemodynamic effects of intrathecal clonidine as the sole analgesic agent during first stage of labor. *ANESTHESIOLOGY* 1999; 91:388-96

145. Gautier PE, De Kock M, Fanard L, Van Steenberge A, Hody JL: Intrathecal clonidine combined with sufentanil for labor analgesia. *ANESTHESIOLOGY* 1998; 88:651-6

146. D'Angelo R, Evans E, Dean LA, Gaver R, Eisenach JC: Spinal clonidine prolongs labor analgesia from spinal sufentanil and bupivacaine. *Anesth Analg* 1999; 88:573-6

147. Owen MD, Ozsarac O, Sahin S, Uckunkaya N, Kaplan N, Magunaci I: Low-dose clonidine and neostigmine prolong the duration of intrathecal bupivacaine-fentanyl for labor analgesia. *ANESTHESIOLOGY* 2000; 92:361-6

148. Pan PM, Huang CT, Wei TT, Mok MS: Enhancement of analgesic effect of intrathecal neostigmine and clonidine on bupivacaine spinal anesthesia. *Reg Anesth Pain Med* 1998; 23:49-56

149. Liu SS, Hodgson PS, Moore JM, Trautman WJ, Burkhead DL: Dose-response effects of spinal neostigmine added to bupivacaine spinal anesthesia in volunteers. *ANESTHESIOLOGY* 1999; 90:710-7

150. Lauretti GR, Hood DD, Eisenach JC, Pfeifer BL: A multi-center study of intrathecal neostigmine for analgesia following vaginal hysterectomy. *ANESTHESIOLOGY* 1998; 89:913-8

151. Klamt JG, Garcia LV, Prado WA: Analgesic and adverse effects of a low dose of intrathecally administered hyperbaric neostigmine alone or combined with morphine in patients submitted to spinal anaesthesia: Pilot studies. *Anaesthesia* 1999; 54:27-31

152. Lauretti GR, Mattos AL, Reis MP, Prado WA: Intrathecal neostigmine for postoperative analgesia after orthopedic surgery. *J Clin Anesth* 1997; 9:473-7

153. Tan PH, Liu K, Peng CH, Yang LC, Lin CR, Lu CY: The effect of dexamethasone on postoperative pain and emesis after intrathecal neostigmine. *Anesth Analg* 2001; 92:228-32

154. Lauretti GR, Mattos AL, Gomes JMA, Pereira NL: Postoperative analgesia and antiemetic efficacy after intrathecal neostigmine in patients undergoing abdominal hysterectomy during spinal anesthesia. *Reg Anesth* 1997; 22:527-33

155. Nelson KE, D'Angelo R, Foss ML, Meister GC, Hood DD, Eisenach JC: Intrathecal neostigmine and sufentanil for early labor analgesia. *ANESTHESIOLOGY* 1999; 91:1293-8

156. Krukowski JA, Hood DD, Eisenach JC, Mallak KA, Parker RL: Intrathecal neostigmine for post-caesarean section analgesia: Dose response. *Anesth Analg* 1997; 84:1269-75

157. Chung CJ, Kim JS, Park HS, Chin YJ: The efficacy of intrathecal neostigmine, intrathecal morphine, and their combination for post-caesarean section analgesia. *Anesth Analg* 1998; 87:341-6

158. Jorgensen H: Lumbar epidural anaesthesia with bupivacaine 0.75%: A clinical evaluation of 371 cases. *Reg Anaesth* 1982; 5:30-3
159. Brockway MS, Bannister J, McClure JH, McKeown D, Wildsmith JAW: Comparison of extradural ropivacaine and bupivacaine. *Br J Anaesth* 1991; 66:31-7
160. Morrison LMM, Emanuelsson BM, McClure JH, Pollok AJ, McKeown DW, Brockway M, Jozwiak H, Wildsmith JAW: Efficacy and kinetics of extradural ropivacaine: Comparison with bupivacaine. *Br J Anaesth* 1994; 72:164-9
161. Wood MB, Rubin AP: A comparison of epidural 1% ropivacaine and 0.75% bupivacaine for lower abdominal gynecologic surgery. *Anesth Analg* 1993; 76:1274-8
162. Finucane BT, Sandler AN, McKenna J, Reid D, Milner AL, Friedlander M, Muzyka D, O'Callaghan-Enright S, Chan V: A double-blind comparison of ropivacaine 0.5%, 0.75%, 1.0% and bupivacaine 0.5%, injected epidurally, in patients undergoing abdominal hysterectomy. *Can J Anaesth* 1996; 43:442-9
163. Wolff AP, Hasselstrom L, Kerkkamp HE, Gielen MJ: Extradural ropivacaine and bupivacaine in hip surgery. *Br J Anaesth* 1995; 74:458-60
164. Niesel HC, Eilingsfeldt T, Hornung M, Kaiser H: Plain ropivacaine 1% versus bupivacaine 0.75% in epidural anesthesia: A comparative study in orthopedic surgery. *Anaesthesist* 1993; 42:605-11
165. Bjornestad E, Smedvig JP, Bjerkreim T, Narverud G, Kollerod D, Bergheim R: Epidural ropivacaine 7.5 mg/ml for elective caesarean section: A double-blind comparison of efficacy and tolerability with bupivacaine 5 mg/ml. *Acta Anaesthesiol Scand* 1999; 43:603-8
166. Bader AM, Tsen LC, Camann WR, Nephew E, Datta S: Clinical effects and maternal and fetal plasma concentrations of 0.5% epidural levobupivacaine versus bupivacaine for caesarean delivery. *ANESTHESIOLOGY* 1999; 90:1596-601
167. Lanz E, Kehrberger E, Theiss D: Epidural morphine: A clinical double-blind study of dosage. *Anesth Analg* 1985; 64:786-91
168. Gürel A, Ünal N, Elevli M, Eren A: Epidural morphine for postoperative pain relief in anorectal surgery. *Anesth Analg* 1986; 65:499-502
169. Rucci FS, Cardamone M, Miglioni P: Fentanyl and bupivacaine mixtures for extradural blockade. *Br J Anaesth* 1985; 57:275-84
170. Engel JM, Hussmann R, Gurtler KH, Menges T, Hempelmann G: Dose-range effects of clonidine added to ropivacaine for epidural analgesia in orthopedic surgery. *Anaesthesist* 1998; 47:565-70
171. Laishley RS, Morgan BM, Reynolds F: Effect of adrenaline on extradural anaesthesia and plasma bupivacaine concentrations during caesarean section. *Br J Anaesth* 1988; 60:180-6
172. Eisenach JC, Schlairet TJ, Dobson CE, Hood DH: Effect of prior anesthetic solution on epidural morphine analgesia. *Anesth Analg* 1991; 73:119-23
173. Noble DW, Morrison LM, Brockway MS, McClure JH: Adrenaline, fentanyl, or adrenaline and fentanyl as adjuncts to bupivacaine for extradural anaesthesia in elective caesarean section. *Br J Anaesth* 1991; 66:645-50
174. Vincent RD, Chestnut DH, Choi WW, Ostman PLG, Bates JN: Does epidural fentanyl decrease the efficacy of epidural morphine after caesarean delivery? *Anesth Analg* 1992; 74:658-63
175. Emanuelsson BMK, Zaric D, Nydahl PA, Axelsson KH: Pharmacokinetics of ropivacaine and bupivacaine during 21 hours of continuous epidural infusion in healthy male volunteers. *Anesth Analg* 1995; 81:1163-8
176. Vertommen JD, Vandermeulen E, Vanaken H, Vaes L, Seotens M, Vansteenberghe A, Mourisse P, Willaert J, Noorduyn H, Devlieger H, Vanassche AF: The effects of the addition of 0.125% to bupivacaine on the quality of analgesia during labor and on the incidence of instrumental deliveries. *ANESTHESIOLOGY* 1991; 74:809-14
177. Lysak SZ, Eisenach JC, Dobson CE: Patient-controlled epidural analgesia during labor: A comparison of three solutions with a continuous infusion control. *ANESTHESIOLOGY* 1990; 72:44-9
178. Li DF, Rees GAD, Rosen M: Continuous extradural infusion of 0.0625% or 0.125% bupivacaine for pain relief in primigravid labour. *Br J Anaesth* 1985; 57:264-70
179. Bailey CR, Ruggier R, Findley IL: Diamorphine-bupivacaine mixture compared with plain bupivacaine for analgesia. *Br J Anaesth* 1994; 72:58-61
180. Rosen MA, Hughes SC, Shnider SM, Abboud TK, Norton M, Dailey PA, Curtis JD: Epidural morphine for the relief of postoperative pain after caesarean delivery. *Anesth Analg* 1983; 62:666-72
181. Chestnut DH, Vandewalker GE, Owen CL, Bates JN, Choi WW: Administration of metoclopramide for prevention of nausea and vomiting during epidural anesthesia for elective caesarean section. *ANESTHESIOLOGY* 1987; 66:563-6
182. Ure D, James KS, McNeill M: Nausea and vomiting during caesarean section under spinal anaesthesia (letter). *Anaesthesia* 1999; 54:913
183. Curatolo M, Petersen-Felix S, Arendt-Nielsen L, Zbinden AM: Epidural epinephrine and clonidine segmental analgesia and effects on different pain modalities. *ANESTHESIOLOGY* 1997; 87:785-94
184. Bromage PR, Camporesi EM, Durant PA, Nielsen CH: Influence of epinephrine as an adjuvant to epidural morphine. *ANESTHESIOLOGY* 1983; 58:257-62
185. Collier C: Epinephrine and epidural narcotics. *ANESTHESIOLOGY* 1984; 60:168-9
186. Dougherty TB, Baysinger CL, Hennenberger JC, Gooding DJ: Epidural hydromorphone with and without epinephrine for post-operative analgesia after caesarean delivery. *Anesth Analg* 1989; 68:318-22
187. Vercauteren MP, Vandepuut DM, Meert TF, Adriaensen HA: Patient-controlled epidural analgesia with sufentanil following caesarean section: The effect of adrenaline and clonidine admixture. *Anaesthesia* 1994; 49:767-71
188. Semple AJ, Macrae DJ, Munishankarappa S, Burrow LM, Milne MK, Grant IS: Effect of the addition of adrenaline to extradural diamorphine analgesia after caesarean section. *Br J Anaesth* 1988; 60:632-8
189. Leicht CH, Kelleher AJ, Robinson DE, Dickerson SE: Prolongation of postoperative epidural sufentanil analgesia with epinephrine. *Anesth Analg* 1990; 70:323-5
190. Cohen S, Lowenwirt I, Pantuck CB, Amar D, Pantuck EJ: Bupivacaine 0.01% and/or epinephrine 0.5 µg/ml improve epidural fentanyl analgesia after caesarean section. *ANESTHESIOLOGY* 1998; 89:1354-61
191. Reiz S, Westberg M: Side-effects of epidural morphine. *Lancet* 1980; 2(8187):203-4
192. Bromage PR, Camporesi EM, Durant PAC, Nielsen CH: Nonrespiratory side effects of epidural morphine. *Anesth Analg* 1982; 61:490-5
193. Rawal N, Mollefors K, Axelsson K, Lingardh G, Widman B: An experimental study of urodynamic effects of epidural morphine and of naloxone reversal. *Anesth Analg* 1983; 62:641-7
194. Gerig HJ, Kern F: Postoperative analgesia with epidural morphine after hip operations. *Anaesthesist* 1982; 31:87-9
195. Martin R, Salbaing J, Blaise G, Tetreault JP, Tetreault L: Epidural morphine for postoperative pain relief: A dose-response curve. *ANESTHESIOLOGY* 1982; 56:423-6
196. Allen PD, Walman T, Concepcion M, Sheskey M, Patterson MK, Cullen D, Covino BG: Epidural morphine provides postoperative pain relief in peripheral vascular and orthopedic surgical patients: A dose-response study. *Anesth Analg* 1986; 65:165-70
197. Loper KA, Ready LB: Epidural morphine after anterior cruciate ligament repair: A comparison with patient-controlled intravenous morphine. *Anesth Analg* 1989; 68:350-2
198. Lirzin JD, Jacquinot P, Dailland P, Jorrot JC, Jasson J, Talafre ML, Conseiller C: Controlled trial of extradural bupivacaine with fentanyl, morphine, or placebo for pain relief in labour. *Br J Anaesth* 1989; 62:641-4
199. MacDonald R, Smith PJB: Extradural morphine and pain relief following episiotomy. *Br J Anaesth* 1984; 56:1201-5
200. Fuller JG, McMorland GH, Douglas MJ, Palmer L: Epidural morphine for analgesia after caesarean section: A report of 4880 patients. *Can J Anaesth* 1990; 37:636-40
201. Daley MD, Sandler AN, Turner KE, Vosu H, Slavchenko P: A comparison of epidural and intramuscular morphine in patients following caesarean section. *ANESTHESIOLOGY* 1990; 72:289-94
202. Palmer CM, Nogami WM, Van Maren G, Alves DM: Postcaesarean epidural morphine: A dose-response study. *Anesth Analg* 2000; 90:887-91
203. Coda BA, Brown MC, Risler L, Syrjala K, Shen DD: Equivalent analgesia and side effects during epidural and pharmacokinetically tailored intravenous infusion with matching plasma alfentanil concentration. *ANESTHESIOLOGY* 1999; 90:98-108
204. Coda BA, Brown MC, Schaffer R, Donaldson G, Jacobson R, Hautman B, Shen DD: Pharmacology of epidural fentanyl, alfentanil, and sufentanil in volunteers. *ANESTHESIOLOGY* 1994; 81:1149-61
205. Hore PJ, Silbert BS, Cook RJ, Beilby DSN: A double-blind assessment of segmental sensory changes with epidural fentanyl versus epidural saline in patients undergoing extracorporeal shock wave lithotripsy. *ANESTHESIOLOGY* 1990; 72:603-6
206. Ferrante FM, Fanciullo GJ, Grichnik KP, Vaisman J, Sacks GM, Concepcion MA: Regression of sensory anesthesia during continuous epidural infusions of bupivacaine and opioid for total knee replacement. *Anaesth Analg* 1993; 77:1179-84
207. Curatolo M, Petersen-Felix S, Scaramozzino P, Zbinden AM: Epidural fentanyl, adrenaline, and clonidine as adjuvants to local anaesthetics for surgical analgesia: Meta-analyses of analgesia and side-effects. *Acta Anaesthesiol Scand* 1998; 42:910-20
208. Gedney JA, Liu EH: Side-effects of epidural infusions of opioid-bupivacaine mixtures. *Anaesthesia* 1998; 53:1148-55
209. D'Angelo R, Grenacher JC, Eisenach JC, Raphael BL: Epidural fentanyl produces labor analgesia by a spinal mechanism. *ANESTHESIOLOGY* 1998; 88:1519-23
210. Preston PG, Rosen MA, Hughes SC, Glosten B, Ross BK, Daniels D, Shnider SM, Dailey PA: Epidural anesthesia with fentanyl and lidocaine for caesarean section: Maternal effects and neonatal outcome. *ANESTHESIOLOGY* 1988; 68:938-43
211. Thomas H, Asskali F, Vettermann J: Addition of fentanyl to epidural bupivacaine analgesia for caesarean section. *Anaesthesist* 1996; 45:635-42
212. Naulty JS, Datta S, Osteheimer GW, Johnson MD, Burger GA: Epidural fentanyl for postcaesarean delivery pain management. *ANESTHESIOLOGY* 1985; 63:694-8
213. Yee I, Carstoniu J, Halpern S, Pittini R: A comparison of two doses of epidural fentanyl during caesarean section. *Can J Anaesth* 1993; 40:722-5
214. Celleno D, Costantino P, Emanuelli M, Capogna C, Muratori F, Sebastiani M, Cipriani G: Epidural analgesia during and after caesarean delivery: Comparison of five opioids. *Reg Anesth* 1991; 16:79-83
215. Cooper DW, Ryall DM, McHardy FE, Lindsay SL, Eldabe SS: Patient-

controlled extradural analgesia with bupivacaine, fentanyl, or a mixture of both after caesarean section. *Br J Anaesth* 1996; 76:611-5

216. Fischer RL, Lubenow TR, Liceaga A, McCarthy RJ, Ivankovich AD: Comparison of continuous epidural infusion of fentanyl-bupivacaine and morphine-bupivacaine in management of postoperative pain. *Anesth Analg* 1988; 67: 559-63

217. Cooper DW, Saleh U, Taylor M, Whyte S, Ryall D, Kokri MS, Desira WR, Day H, McArthur E: Patient-controlled analgesia: Epidural fentanyl and i.v. morphine compared after caesarean section. *Br J Anaesth* 1999; 82:366-70

218. Reynvoet M, Dionys M, Vermaut G, Van Aken H: Surgical analgesia for knee arthroscopy with epidural lignocaine and sufentanil-effect of varying sufentanil doses. *Acta Anaesthesiol Belg* 1990; 41:319-25

219. Graf G, Sinatra R, Chung J, Frasca A, Silverman DG: Epidural sufentanil for postoperative analgesia: Dose-response in patients recovering from major gynecologic surgery. *Anesth Analg* 1991; 73:405-9

220. Sinatra RS, Sevarino FB, Chung JH, Graf G, Paige D, Takla V, Silverman DG: Comparison of epidurally administered sufentanil, morphine, and sufentanil-morphine combination for postoperative analgesia. *Anesth Analg* 1991; 72:522-7

221. Debon R, Allaouchiche B, Duflo F, Boselli E, Chassard D: The analgesic effect of sufentanil combined with ropivacaine 0.2% for labor analgesia: A comparison of three sufentanil doses. *Anesth Analg* 2001; 92:180-3

222. Crosby ET, Bryson GL, Elliott RD, Gverzdys C: Epidural sufentanil does not attenuate the central haemodynamic effects of caesarean section performed under epidural anaesthesia. *Can J Anaesth* 1994; 41:192-7

223. Madej TH, Strunin L: Comparison of epidural fentanyl with sufentanil. Analgesia and side effects after a single bolus dose during elective caesarean section. *Anaesthesia* 1987; 42:1156-61

224. Grass JA, Sakima NT, Schmidt R, Michitsch R, Zuckerman RL, Harris AP: A randomized, double-blind, dose-response comparison of epidural fentanyl versus sufentanil analgesia after cesarean section. *Anesth Analg* 1997; 85:365-71

225. Dottrens M, Rifat K, Morel DR: Comparison of extradural administration of sufentanil, morphine, and sufentanil-morphine combination after caesarean section. *Br J Anaesth* 1992; 69:9-12

226. Baraka A, Maktabi M, Noueihid R: Epidural meperidine-bupivacaine for obstetric analgesia. *Anesth Analg* 1982; 61:652-6

227. Kee WDN, Lam KK, Chen PP, Gin T: Epidural meperidine after cesarean section: A dose-response study. *ANESTHESIOLOGY* 1996; 85:289-94

228. Rosaceg OP, Lindsay MP: Epidural opioid analgesia after caesarean section: A comparison of patient-controlled analgesia with meperidine and single bolus injection of morphine. *Can J Anaesth* 1994; 41:1063-8

229. Goh JL, Evans SF, Pavy TJG: Patient-controlled epidural analgesia following caesarean delivery: A comparison of pethidine and fentanyl. *Anaesth Intensive Care* 1996; 24:45-50

230. Eisenach JC, Detweiler D, Hood D: Hemodynamic and analgesic actions of epidurally administered clonidine. *ANESTHESIOLOGY* 1993; 78:277-87

231. Eisenach JC, DuPen S, Dubois M, Miguel R, Allin D, Bryce D, Burger GA, Chamberlain D, Docherty R, Evans G, Finnegan R, Hantler C, Kaplan R, Kitahata L, Leak WD, Lema M, Payne R, Rauck R, Rosen SM, Shildt R, Skerman J, Slover R, Zaccaro D: Epidural clonidine analgesia for intractable cancer pain. *Pain* 1995; 61:391-9

232. Milligan KR, Convery PN, Weir P, Quinn P, Connolly D: The efficacy and safety of epidural infusions of levobupivacaine with and without clonidine for postoperative pain relief in patients undergoing total hip replacement. *Anesth Analg* 2000; 91:393-7

233. Peach MJ, Pavy TJ, Orlikowski CE, Evans SF: Patient-controlled epidural analgesia in labor: The addition of clonidine to bupivacaine-fentanyl. *Reg Anesth Pain Med* 2000; 25:34-40

234. Capogna G, Celleno D, Zangrillo A, Costantino P, Foresta S: Addition of clonidine to epidural morphine enhances postoperative analgesia after caesarean delivery. *Reg Anesth* 1995; 20:57-61

235. Lauretti GR, Gomes JMA, Reis MP, Pereira NL: Low doses of epidural ketamine or neostigmine, but not midazolam, improve morphine analgesia in epidural terminal cancer pain therapy. *J Clin Anesth* 1999; 11:663-9

236. Lauretti GR, De Oliveira R, Reis MP, Juliao MDC, Pereira NL: Study of three different doses of epidural neostigmine coadministered with lidocaine for postoperative analgesia. *ANESTHESIOLOGY* 1999; 90:1534-8

237. Mulroy MF, Larkin KL, Hodgson PS, Helman JD, Pollock JE, Liu SS: A comparison of spinal, epidural, and general anesthesia for outpatient knee arthroscopy. *Anesth Analg* 2000; 91:860-4

238. Seeberger MD, Lang ML, Drewe J, Schneider M, Hauser E, Hruby J: Comparison of spinal and epidural anesthesia for patients younger than 50 years of age. *Anesth Analg* 1994; 78:667-73

239. Choi DH, Kim JA, Chung IS: Comparison of combined spinal epidural anesthesia and epidural anesthesia for cesarean section. *Acta Anaesthesiol Scand* 2000; 44:214-9

240. Möllmann M, Cord S, Holst D, der Landwehr UA: Continuous spinal anaesthesia or continuous epidural anaesthesia for postoperative pain control after hip replacement. *Eur J Anaesthesiol* 1999; 16:454-61

241. Halter F, Niesel HC, Gladrow W, Kaiser H: CSE vs. augmented epidural anaesthesia for caesarean section: Spinal- and epidural anaesthesia with bupivacaine 0.5% "isobar" require augmentation. *Anaesthesist* 1998; 47:747-56

242. Olofsson C, Ekblom A, Skoldefors E, Waglund B, Irestedt L: Anesthetic quality during caesarean section following subarachnoid or epidural administra-

tion of bupivacaine with or without fentanyl. *Acta Anaesthesiol Scand* 1997; 41:332-8

243. Kossmann B, Dick W, Wollinsky KH, Bowdler I, Mehrkens HH, Bock M, Möller MR: Comparative studies of side-effects of morphine after peridural, spinal and intravenous application. *Anaesthesist* 1984; 33:25-31

244. Hallworth SP, Fernando R, Bell R, Parry MG, Lim GH: Comparison of intrathecal and epidural diamorphine for elective caesarean section using a combined spinal-epidural technique. *Br J Anaesth* 1999; 82:228-32

245. Abouleish E, Rawal N, Shaw J, Lorenz T, Rashad MN: Intrathecal morphine 0.2 mg versus epidural bupivacaine 0.125% or their combination: Effects on parturients. *ANESTHESIOLOGY* 1991; 74:711-6

246. Klein SM, Bergh A, Steele SM, Georgiade GS, Greengrass RA: Thoracic paravertebral block for breast surgery. *Anesth Analg* 2000; 90:1402-5

247. Szmuk P, Ezri T, Benhur H, Caspi B, Priscu L, Priscu V: Regional anaesthesia for circumcision in adults: A comparative study. *Can J Anaesth* 1994; 41:1181-4

248. Vloka JD, Hadzic A, Mulcare R, Lesser JB, Kitain E, Thys DM: Femoral and genitofemoral nerve blocks versus spinal anesthesia for outpatients undergoing long saphenous vein stripping surgery. *Anesth Analg* 1997; 84:749-52

249. Patel NJ, Flashburg MH, Paskin S, Grossman R: A regional anesthetic technique compared to general anesthesia for outpatient knee arthroscopy. *Anesth Analg* 1996; 65:185-7

250. Chilvers CR, Kinahan A, Vaghadia H, Merrick PM: Pharmacoeconomics of intravenous regional anaesthesia vs general anaesthesia for outpatient hand surgery. *Can J Anaesth* 1997; 44:1152-6

251. Hickey R, Hoffmann J, Ramamurthy S: A comparison of ropivacaine 0.5% and bupivacaine 0.5% for brachial plexus block. *ANESTHESIOLOGY* 1991; 74:639-42

252. Racz H, Gunning K, Dellasanta D, Forster A: Evaluation of the effect of perineuronal morphine on the quality of postoperative analgesia after axillary plexus block: A randomized double-blind study. *Anesth Analg* 1991; 72:769-72

253. Gormley WP, Murray JM, Fee JJP, Bower S: Effect of the addition of alfentanil to lignocaine during axillary brachial plexus anaesthesia. *Br J Anaesth* 1996; 76:802-5

254. Bouaziz H, Kinirons BP, Macalou D, Heck M, Dap F, Behamou D, Laxenaire MC: Sufentanil does not prolong the duration of analgesia in a mepivacaine brachial plexus block: A dose response study. *Anesth Analg* 2000; 90:383-7

255. Erlacher W, Schuschnig C, Orlicek F, Marhofer P, Koinig H, Kapral S: The effects of clonidine on ropivacaine 0.75% in axillary perivascular brachial plexus block. *Acta Anaesthesiol Scand* 2000; 44:53-7

256. Bouaziz H, Paqueron X, Bur ML, Merle M, Laxenaire MC, Benhamou D: No enhancement of sensory and motor blockade by neostigmine added to mepivacaine axillary plexus block. *ANESTHESIOLOGY* 1999; 91:78-83

257. Gaumann D, Forster A, Griessen M, Habre W, Poinot O, Della Santa D: Comparison between clonidine and epinephrine admixture to lidocaine in brachial plexus block. *Anesth Analg* 1992; 75:69-74

258. Bone HG, Van Aken H, Booke B, Burkle H: Enhancement of axillary brachial plexus block anesthesia by coadministration of neostigmine. *Reg Anesth Pain Med* 1999; 24:405-10

259. Simon MAM, Gielen MJM, Alberink N, Vree TB, van Egmond J: Intravenous regional anesthesia with 0.5% articaine, 0.5% lidocaine, or 0.5% prilocaine. *Reg Anesth* 1997; 22:29-34

260. Lavin PA, Henderson CL, Vaghadia H: Non-alkalinized and alkalinized 2-chloroprocaine vs lidocaine for intravenous regional anesthesia during outpatient hand surgery. *Can J Anaesth* 1999; 46:939-45

261. Arthur JM, Heavner JE, Mian T, Rosenberg PH: Fentanyl and lidocaine versus lidocaine for Bier block. *Reg Anesth* 1992; 17:223-7

262. Acalovschi J, Cristea T: Intravenous regional anesthesia with meperidine. *Anesth Analg* 1995; 81:539-43

263. Reuben SS, Steinberg RB, Lurie SD, Gibson CS: A dose-response study of intravenous regional anesthesia with meperidine. *Anesth Analg* 1999; 88:831-5

264. Kleinschmidt S, Stockl W, Wilhelm W, Larsen R: The addition of clonidine to prilocaine for intravenous regional anaesthesia. *Eur J Anaesthesiol* 1997; 14:40-6

265. Stockdale A, Bellman M: An audit of post-operative pain and nausea in day case surgery. *Eur J Anaesthesiol* 1998; 15:271-4

266. Klein SM, Greengrass RA, Weltz C, Warner DS: Paravertebral somatic nerve block for outpatient inguinal herniorrhaphy: An expanded case report of 22 patients. *Reg Anesth Pain Med* 1998; 23:306-10

267. Mansour NY, Bennetts FE: An observational study of combined continuous lumbar plexus and single-shot sciatic nerve blocks for post-knee surgery analgesia. *Reg Anesth* 1996; 21:287-91

268. Casati A, Cappelleri G, Fanelli G, Borghi B, Anelati D, Berti M, Torri G: Regional anaesthesia for outpatient knee arthroscopy: A randomized clinical comparison of two different anaesthetic techniques. *Acta Anaesthesiol Scand* 2000; 44:543-7

269. Singelyn FJ, Aye F, Gouverneur JM: Continuous popliteal sciatic nerve block: An original technique to provide postoperative analgesia after foot surgery. *Anesth Analg* 1997; 84:383-6

270. Vloka JD, Hadzic A, Mulcare R, Lesser JB, Koorn R, Thys DM: Combined popliteal and posterior cutaneous nerve of the thigh blocks for short saphenous vein stripping in outpatients: An alternative to spinal anesthesia. *J Clin Anesth* 1997; 9:618-22

271. Magistris L, Casati A, Albertin A, Deni F, Danelli G, Borghi B, Fanelli G:



Combined sciatic-femoral nerve block with 0.75% ropivacaine: Effects of adding a systemically inactive dose of fentanyl. *Eur J Anaesthesiol* 2000; 17:348-53

272. Reinhart DJ, Wang W, Stagg KS, Walker KG, Bailey PL, Walker EB, Zaugg SE: Postoperative analgesia after peripheral nerve block for podiatric surgery: Clinical efficacy and chemical stability of lidocaine alone versus lidocaine plus clonidine. *Anesth Analg* 1996; 83:760-5

273. Brodner G, Mertes N, Buerkle H, Marcus MAE, Van Aken H: Acute pain management: Analysis, implications and consequences after prospective experience with 6349 surgical patients. *Eur J Anaesthesiol* 2000; 17:566-75

274. Borgeat A, Perschak H, Bird P, Hodler J, Gerber C: Patient-controlled interscalene analgesia with ropivacaine 0.2% versus patient-controlled intravenous analgesia after major shoulder surgery. *ANESTHESIOLOGY* 2000; 92:102-8

275. Borgeat A, Tewes E, Biasca N, Gerber C: Patient-controlled interscalene analgesia with ropivacaine after major shoulder surgery: PCIA vs PCA. *Br J Anaesth* 1998; 81:603-5

276. Borgeat A, Schäppi B, Biasca N, Gerber C: Patient-controlled analgesia after major shoulder surgery. *ANESTHESIOLOGY* 1997; 87:1343-7

277. Singelyn FJ, Seguy S, Gouverneur JM: Interscalene brachial plexus anal-

gesia after open shoulder surgery: Continuous versus patient-controlled infusion. *Anesth Analg* 1999; 89:1216-20

278. Lehtipalo S, Koskinen LOD, Johansson G, Kolmodin J, Biber B: Continuous interscalene brachial plexus block for postoperative analgesia following shoulder surgery. *Acta Anaesthesiol Scand* 1999; 43:258-64

279. Singelyn FJ, Deyaert M, Joris D, Pendeville E, Gouverneur JM: Effects of intravenous patient-controlled analgesia with morphine, continuous epidural analgesia, and continuous three-in-one block on postoperative pain and knee rehabilitation after unilateral total knee arthroplasty. *Anesth Analg* 1998; 87:88-92

280. Schultz P, Ankermoller E, Dahl JB, Christensen EF, Spangsborg N, Fauno P: Postoperative pain treatment after open knee surgery: Continuous lumbar plexus block with bupivacaine versus epidural morphine. *Reg Anesth* 1991; 16:34-7

281. Ganapathy S, Wasserman RA, Watson JT, Bennett J, Armstrong KP, Stockall CA, Chess DG, MacDonald C: Modified continuous femoral three-in-one block for postoperative pain after total knee arthroplasty. *Anesth Analg* 1999; 89:1197-202

282. Kapur PA: The big "little problem." *Anesth Analg* 1991; 73:243-5
